# Supplementary material for: Potentially Toxic Elements in Water, Sediments and Fish from the Karstic River (Raša River, Croatia) Located in the Former Coal-Mining Area
Source: MDPI journal article supplement (doi:10.3390/toxics11010042), 2022-12-31
Supplement: s1 [file s1]

# Toxics

Supplementary Materials for

## Potentially toxic elements (PTEs) in water, fish and sediments from the karstic river (Raša River, Croatia) located in the abandoned coal-mining area

By: Zorana KLJAKOVIĆ-GAŠPIĆ\*, Ankica SEKOVANIĆ, Tatjana ORCT, Dora ŠEBEŠĆEN, Elena KLASIČEK, Davor ZANELLA

Corresponding author:

\*Zorana Kljaković-Gašpić

Institute for Medical Research and Occupational Health (IMROH)

Ksaverska cesta 2, HR-10000 Zagreb, Croatia

e-mail: zorana@imi.hr

Phone: 00385 1 4682 534

Fax: 00385 1 4673 303

## Content

|    |                                                                                                                                                                 |           |             |
|----|-----------------------------------------------------------------------------------------------------------------------------------------------------------------|-----------|-------------|
| 1  | ICP-MS 7500cx (Agilent Technologies, Japan) optimized working conditions.                                                                                       | Table S1  | Page 2      |
| 2  | Limits of detection (LOD) of the methods for determination of major and trace elements by ICP-MS in water, fish tissue and sediment                             | Table S2  | Page 3      |
| 3  | Temperature program for digestion of fish tissues and sediment in the microwave digestion system UltraCLAVE IV (Milestone, Sorisole, Italy)                     | Table S3  | Page 4      |
| 4  | Grades on the basis of $EF$ , $I_{geo}$ , and $PLI$ values                                                                                                      | Table S4  | Page 4      |
| 5  | Grade standards for $E_r^j$ and $RI$                                                                                                                            | Table S5  | Page 4      |
| 6  | Correlation coefficients for mass fractions of 30 elements in sediments of the upper and middle course of the Raša River                                        | Table S6  | Page 5      |
| 7  | Results of the Principal Components Analysis (PCA) (Varimax rotated) of concentration of elements from the Raša River                                           | Table S7  | Page 6      |
| 8  | The enrichment factors (EF) of metal(loid)s in the sediments                                                                                                    | Table S8  | Page 7      |
| 9  | Index of geo-accumulation ( $I_{geo}$ ) of metal(loid)s in the sediments                                                                                        | Table S9  | Page 8      |
| 10 | Pollution index (PLI) of metal(loid)s in the sediments                                                                                                          | Table S10 | Page 9      |
| 11 | $E_r^j$ and $RI$ of metal(loid)s in the sediments                                                                                                               | Table S11 | Page 10     |
| 12 | Comparison of average concentrations of potentially toxic elements in muscle tissue of six freshwater fish species from the Raša River with the literature data | Table S12 | Pages 11–14 |
| 13 | Comparison of average concentrations of macro and trace elements in muscle tissue of six freshwater fish species from the Raša River with the literature data   | Table S13 | Pages 15–16 |

**Table S1** ICP-MS 7500cx (Agilent Technologies, Tokyo, Japan) optimized working conditions.

| Parameter                                               |                                                                                            |                      |                                                                                                                                                                                                                                                                                                                                                                                                                                                                                   |
|---------------------------------------------------------|--------------------------------------------------------------------------------------------|----------------------|-----------------------------------------------------------------------------------------------------------------------------------------------------------------------------------------------------------------------------------------------------------------------------------------------------------------------------------------------------------------------------------------------------------------------------------------------------------------------------------|
| RF Power (W)                                            | 1550                                                                                       |                      |                                                                                                                                                                                                                                                                                                                                                                                                                                                                                   |
| RF matching (V)                                         | 1.68                                                                                       |                      |                                                                                                                                                                                                                                                                                                                                                                                                                                                                                   |
| Sampling depth (mm)                                     | 7.5                                                                                        |                      |                                                                                                                                                                                                                                                                                                                                                                                                                                                                                   |
| Torch-H (mm)                                            | 0.4                                                                                        |                      |                                                                                                                                                                                                                                                                                                                                                                                                                                                                                   |
| Torch-V (mm)                                            | -0.4                                                                                       |                      |                                                                                                                                                                                                                                                                                                                                                                                                                                                                                   |
| Nebulizer pump flow (rps)                               | 0.08                                                                                       |                      |                                                                                                                                                                                                                                                                                                                                                                                                                                                                                   |
| Plasma gas flow rate (L min <sup>-1</sup> )             | 15                                                                                         |                      |                                                                                                                                                                                                                                                                                                                                                                                                                                                                                   |
| Makeup gas flow rate (L min <sup>-1</sup> )             | 0.1                                                                                        |                      |                                                                                                                                                                                                                                                                                                                                                                                                                                                                                   |
| Carrier gas flow rate (L min <sup>-1</sup> )            | 1.05                                                                                       |                      |                                                                                                                                                                                                                                                                                                                                                                                                                                                                                   |
| Nebulizer                                               | MicroMist (quartz)                                                                         |                      |                                                                                                                                                                                                                                                                                                                                                                                                                                                                                   |
| Spray chamber                                           | Scott type (quartz), cooled at 2 °C                                                        |                      |                                                                                                                                                                                                                                                                                                                                                                                                                                                                                   |
| Sample cone                                             | Nickel, 1 mm orifice diameter                                                              |                      |                                                                                                                                                                                                                                                                                                                                                                                                                                                                                   |
| Skimmer cone                                            | Nickel, 0.4 mm orifice diameter                                                            |                      |                                                                                                                                                                                                                                                                                                                                                                                                                                                                                   |
| Doubly-charged ions and oxides limits                   | <sup>140</sup> Ce <sup>2+</sup> / <sup>140</sup> Ce <sup>+</sup> <2.2%                     |                      |                                                                                                                                                                                                                                                                                                                                                                                                                                                                                   |
|                                                         | <sup>140</sup> Ce <sup>16</sup> O <sup>+</sup> / <sup>140</sup> Ce <sup>+</sup> <1.4%      |                      |                                                                                                                                                                                                                                                                                                                                                                                                                                                                                   |
| <b>Collision/reaction gas</b>                           | <b>No gas</b>                                                                              | <b>H<sub>2</sub></b> | <b>He</b>                                                                                                                                                                                                                                                                                                                                                                                                                                                                         |
| Collision/reaction gas flow rate (L min <sup>-1</sup> ) | /                                                                                          | 4.3                  | 4.2                                                                                                                                                                                                                                                                                                                                                                                                                                                                               |
| Extract lens 1 voltage (V)                              | 0                                                                                          | 0                    | 0.5                                                                                                                                                                                                                                                                                                                                                                                                                                                                               |
| Extract lens 2 voltage (V)                              | -150                                                                                       | -150                 | -135                                                                                                                                                                                                                                                                                                                                                                                                                                                                              |
| Isotopes measured                                       | <sup>7</sup> Li, <sup>11</sup> B, <sup>27</sup> Al,<br><sup>202</sup> Hg, <sup>238</sup> U | <sup>78</sup> Se     | <sup>23</sup> Na, <sup>24</sup> Mg, <sup>34</sup> S, <sup>39</sup> K, <sup>43</sup> Ca, <sup>51</sup> V,<br><sup>53</sup> Cr, <sup>55</sup> Mn, <sup>56</sup> Fe, <sup>59</sup> Ca, <sup>60</sup> Ni,<br><sup>63</sup> Cu, <sup>68</sup> Zn, <sup>75</sup> As, <sup>85</sup> Rb, <sup>88</sup> Sr,<br><sup>95</sup> Mo, <sup>107</sup> Ag, <sup>114</sup> Cd, <sup>118</sup> Sn,<br><sup>121</sup> Sb, <sup>133</sup> Cs, <sup>138</sup> Ba, <sup>205</sup> Tl, <sup>208</sup> Pb |

**Table S2** Limits of detection (LOD) of two methods for determination of major and trace elements by ICP-MS in waters (in  $\mu\text{g L}^{-1}$ ), fish tissue (in  $\text{mg kg}^{-1}$  wet mass (wm)) and sediment (in  $\text{mg kg}^{-1}$  dry matter (dm)) collected in Raša River in June of 2020.

| Element | LOD water <sup>a</sup><br>( $\mu\text{g L}^{-1}$ ) | LOD fish<br>( $\text{mg kg}^{-1}$ w.m.) | LOD sediment<br>( $\text{mg kg}^{-1}$ d.m.) |
|---------|----------------------------------------------------|-----------------------------------------|---------------------------------------------|
| Ag      | 0.001                                              | 0.00003                                 | 0.04                                        |
| Al      | contamination                                      | not measured                            | 25.6                                        |
| As      | 0.0015                                             | 0.00007                                 | 0.6                                         |
| B       | not measured                                       | 0.002                                   | 1.4                                         |
| Ba      | 0.05                                               | not measured                            | not measured                                |
| Ca      | 1.5                                                | 0.00002                                 | 0.08                                        |
| Cd      | 0.0004                                             | 0.00003                                 | 0.016                                       |
| Co      | 0.0005                                             | 0.00044                                 | 0.12                                        |
| Cr      | 0.003                                              | 0.000002                                | 2.35                                        |
| Cs      | not measured                                       | not measured                            | 0.004                                       |
| Cu      | 0.1                                                | 0.02                                    | 1.86                                        |
| Fe      | 0.045                                              | 0.00044                                 | 45.9                                        |
| Hg      | 0.0015                                             | 0.11                                    | 0.02                                        |
| K       | 1.9                                                | 0.0002                                  | 0.9                                         |
| Li      | 0.02                                               | 0.015                                   | 2.6                                         |
| Mg      | 0.09                                               | 0.002                                   | 0.023                                       |
| Mn      | 0.004                                              | 0.00015                                 | 0.38                                        |
| Mo      | 0.015                                              | 0.23                                    | 0.02                                        |
| Na      | 0.9                                                | 0.001                                   | 1.16                                        |
| Ni      | 0.021                                              | 0.00004                                 | 1.35                                        |
| P       | not measured                                       | not measured                            | 0.29                                        |
| Pb      | 0.005                                              | 0.000007                                | 0.16                                        |
| Rb      | 0.013                                              | not measured                            | not measured                                |
| Sb      | 0.003                                              | not measured                            | 0.064                                       |
| Se      | 0.0045                                             | 0.00004                                 | 0.36                                        |
| Sn      | 0.003                                              | not measured                            | 0.073                                       |
| Sr      | 0.015                                              | 0.000003                                | 0.135                                       |
| Tl      | 0.015                                              | 0.000003                                | 0.0068                                      |
| U       | 0.0014                                             | 0.00002                                 | 0.002                                       |
| V       | 0.001                                              | 0.006                                   | 0.11                                        |
| Zn      | 0.1                                                | 0.00003                                 | 10.7                                        |

<sup>a</sup> Detection limit of the analysis was calculated according to the equation:  $\text{LOD} = X_{\text{blank}} + K \times \text{SD}_{\text{blank}}$ , where:  $X_{\text{blank}}$  was average element concentration in procedural blank sample (six independent determinations of each blank),  $K = 3$ , and  $\text{SD}_{\text{blank}}$  was the standard deviation of six independent determinations of all procedural blanks.

**Table S3** Temperature program for digestion of fish tissues and sediment in the microwave digestion system UltraCLAVE IV (Milestone Srl, Sorisole, Italy).

| STEP | Fish tissues    |               |               |                   | Sediment        |               |               |                   |
|------|-----------------|---------------|---------------|-------------------|-----------------|---------------|---------------|-------------------|
|      | Time<br>(min:s) | Energy<br>(W) | Temp.<br>(°C) | Pressure<br>(bar) | Time<br>(min:s) | Energy<br>(W) | Temp.<br>(°C) | Pressure<br>(bar) |
| 1.   | 3:30            | 700           | 70            | 100               | 12              | 200           | 75            | 100               |
| 2.   | 15              | 1000          | 180           | 100               | 25              | 300           | 125           | 100               |
| 3.   | 10              | 1000          | 250           | 140               | 10:30           | 500           | 160           | 100               |
| 4.   | 30              | 1000          | 250           | 140               | 12:30           | 1000          | 240           | 160               |
| 5.   | 40              | 0             | 30            | 20                | 40              | 1000          | 240           | 160               |
| 6.   | -               | -             | -             | -                 | 30              | 0             | 30            | 20                |

**Table S4** Grades on the basis of  $EF$ ,  $I_{geo}$ , and  $PLI$  values.

| $EF$              | Enrichment level          | $I_{geo}$            | Pollution level               | $PLI$            | Pollution level                   |
|-------------------|---------------------------|----------------------|-------------------------------|------------------|-----------------------------------|
| $EF < 1$          | Deficiency                | $I_{geo} \leq 0$     | Unpolluted                    | $0 < PLI \leq 1$ | Unpolluted                        |
| $1 \leq EF < 2$   | minimal enrichment        | $0 < I_{geo} \leq 1$ | Slightly polluted             | $1 < PLI \leq 2$ | Unpolluted to moderately polluted |
| $2 \leq EF < 5$   | Moderate enrichment       | $1 < I_{geo} \leq 2$ | Moderately polluted           | $2 < PLI \leq 3$ | Moderately polluted               |
| $5 \leq EF < 20$  | Significant enrichment    | $2 < I_{geo} \leq 3$ | Moderately to heavily         | $3 < PLI \leq 4$ | Moderately to highly polluted     |
| $20 \leq EF < 40$ | Very high enrichment      | $3 < I_{geo} \leq 4$ | Heavily polluted              | $4 < PLI \leq 5$ | Highly polluted                   |
| $40 \leq EF$      | Extremely high enrichment | $4 < I_{geo} \leq 5$ | Heavily to extremely polluted |                  |                                   |
|                   |                           | $I_{geo} > 5$        | Extremely polluted            |                  |                                   |

**Table S5** Grade standards for  $E_r^i$  and  $RI$ .

| $E_r^i$               | Ecological risk grade | $RI$                | Ecological risk grade |
|-----------------------|-----------------------|---------------------|-----------------------|
| $E_r^i < 15$          | Low                   | $RI < 50$           | Low                   |
| $15 \leq E_r^i < 30$  | Moderate              | $50 \leq RI < 100$  | Moderate              |
| $30 \leq E_r^i < 60$  | Considerable          | $100 \leq RI < 200$ | Considerable          |
| $60 \leq E_r^i < 120$ | High                  | $RI \geq 200$       | High                  |
| $E_r^i \geq 120$      | Very high             |                     |                       |

**Table S6** Correlation coefficients for mass fractions of 30 elements in sediments of the upper and middle course of the Raša River. Marked correlations are significant at  $p < 0.05$  ( $N = 15$ ).

|    | Li                                         | B                                                           | Na                      | Mg                                  | Al    | P           | K           | Ca          | V           | Cr    | Fe    | Mn    | Co    | Ni                      | Cu                | Zn          | As    | Se    | Sr    | Mo    | Cd    | Sn    | Sb    | Cs | Ba | Hg | Tl | Pb | U |
|----|--------------------------------------------|-------------------------------------------------------------|-------------------------|-------------------------------------|-------|-------------|-------------|-------------|-------------|-------|-------|-------|-------|-------------------------|-------------------|-------------|-------|-------|-------|-------|-------|-------|-------|----|----|----|----|----|---|
| Li | 1.000                                      |                                                             |                         |                                     |       |             |             |             |             |       |       |       |       |                         |                   |             |       |       |       |       |       |       |       |    |    |    |    |    |   |
| B  | 0.940                                      | 1.000                                                       |                         |                                     |       |             |             |             |             |       |       |       |       |                         |                   |             |       |       |       |       |       |       |       |    |    |    |    |    |   |
| Na | -0.668-0.633                               | 1.000                                                       |                         |                                     |       |             |             |             |             |       |       |       |       |                         |                   |             |       |       |       |       |       |       |       |    |    |    |    |    |   |
| Mg | 0.990                                      | 0.950-0.608                                                 | 1.000                   |                                     |       |             |             |             |             |       |       |       |       |                         |                   |             |       |       |       |       |       |       |       |    |    |    |    |    |   |
| Al | 0.999                                      | 0.942-0.645                                                 | 0.993                   | 1.000                               |       |             |             |             |             |       |       |       |       |                         |                   |             |       |       |       |       |       |       |       |    |    |    |    |    |   |
| P  | 0.988                                      | 0.948-0.631                                                 | 0.985                   | 0.990                               | 1.000 |             |             |             |             |       |       |       |       |                         |                   |             |       |       |       |       |       |       |       |    |    |    |    |    |   |
| K  | 0.989                                      | 0.940-0.567                                                 | 0.992                   | 0.993                               | 0.988 | 1.000       |             |             |             |       |       |       |       |                         |                   |             |       |       |       |       |       |       |       |    |    |    |    |    |   |
| Ca | -0.997-0.936                               | 0.640-0.985-0.997-0.988-0.992                               | 1.000                   |                                     |       |             |             |             |             |       |       |       |       |                         |                   |             |       |       |       |       |       |       |       |    |    |    |    |    |   |
| V  | 0.998                                      | 0.943-0.694                                                 | 0.987                   | 0.997                               | 0.986 | 0.984-0.995 | 1.000       |             |             |       |       |       |       |                         |                   |             |       |       |       |       |       |       |       |    |    |    |    |    |   |
| Cr | 0.389                                      | 0.461-0.015                                                 | 0.429                   | 0.408                               | 0.508 | 0.464-0.398 | 0.375       | 1.000       |             |       |       |       |       |                         |                   |             |       |       |       |       |       |       |       |    |    |    |    |    |   |
| Fe | 0.943                                      | 0.943-0.524                                                 | 0.949                   | 0.950                               | 0.960 | 0.972-0.955 | 0.941       | 0.535       | 1.000       |       |       |       |       |                         |                   |             |       |       |       |       |       |       |       |    |    |    |    |    |   |
| Mn | -0.579-0.566                               | 0.844-0.535-0.560-0.596-0.486                               | 0.553-0.603-0.244-0.431 | 1.000                               |       |             |             |             |             |       |       |       |       |                         |                   |             |       |       |       |       |       |       |       |    |    |    |    |    |   |
| Co | 0.770                                      | 0.805-0.253                                                 | 0.817                   | 0.789                               | 0.838 | 0.831-0.776 | 0.761       | 0.764       | 0.861-0.388 | 1.000 |       |       |       |                         |                   |             |       |       |       |       |       |       |       |    |    |    |    |    |   |
| Ni | 0.980                                      | 0.945-0.554                                                 | 0.991                   | 0.986                               | 0.986 | 0.990-0.979 | 0.976       | 0.489       | 0.955-0.534 | 0.871 | 1.000 |       |       |                         |                   |             |       |       |       |       |       |       |       |    |    |    |    |    |   |
| Cu | 0.973                                      | 0.927-0.674                                                 | 0.957                   | 0.974                               | 0.972 | 0.960-0.969 | 0.977       | 0.449       | 0.923-0.623 | 0.783 | 0.962 | 1.000 |       |                         |                   |             |       |       |       |       |       |       |       |    |    |    |    |    |   |
| Zn | 0.993                                      | 0.946-0.721                                                 | 0.980                   | 0.990                               | 0.986 | 0.976-0.990 | 0.996       | 0.392       | 0.941-0.631 | 0.754 | 0.966 | 0.975 | 1.000 |                         |                   |             |       |       |       |       |       |       |       |    |    |    |    |    |   |
| As | 0.680                                      | 0.783-0.684                                                 | 0.680                   | 0.673                               | 0.704 | 0.667-0.682 | 0.695       | 0.399       | 0.753-0.609 | 0.603 | 0.666 | 0.665 | 0.731 | 1.000                   |                   |             |       |       |       |       |       |       |       |    |    |    |    |    |   |
| Se | -0.291-0.291-0.404-0.354-0.323-0.370-0.422 | 0.323-0.260-0.726-0.498-0.310-0.695-0.419-0.278-0.240-0.123 | 1.000                   |                                     |       |             |             |             |             |       |       |       |       |                         |                   |             |       |       |       |       |       |       |       |    |    |    |    |    |   |
| Sr | -0.993-0.929                               | 0.671-0.981-0.991-0.976-0.984                               | 0.992-0.991-0.366-0.947 | 0.530-0.739-0.962-0.955-0.987-0.682 | 0.297 | 1.000       |             |             |             |       |       |       |       |                         |                   |             |       |       |       |       |       |       |       |    |    |    |    |    |   |
| Mo | -0.785-0.787                               | 0.287-0.798-0.801-0.848-0.845                               | 0.804-0.773-0.797-0.898 | 0.324-0.914-0.842-0.791-0.772-0.638 | 0.736 | 0.783       | 1.000       |             |             |       |       |       |       |                         |                   |             |       |       |       |       |       |       |       |    |    |    |    |    |   |
| Cd | 0.947                                      | 0.936-0.796                                                 | 0.938                   | 0.942                               | 0.951 | 0.919-0.933 | 0.957       | 0.430       | 0.890-0.725 | 0.738 | 0.920 | 0.940 | 0.968 | 0.784-0.155-0.938-0.741 | 1.000             |             |       |       |       |       |       |       |       |    |    |    |    |    |   |
| Sn | 0.891                                      | 0.820-0.687                                                 | 0.874                   | 0.885                               | 0.864 | 0.860-0.889 | 0.887       | 0.284       | 0.820-0.600 | 0.608 | 0.849 | 0.859 | 0.893 | 0.710-0.161-0.880-0.640 | 0.815             | 1.000       |       |       |       |       |       |       |       |    |    |    |    |    |   |
| Sb | -0.070-0.059-0.623-0.145-0.104-0.135-0.206 | 0.102-0.032-0.525-0.263-0.545-0.482-0.202-0.027-0.005       | 0.115                   | 0.945                               | 0.085 | 0.511       | 0.095       | 0.053       | 1.000       |       |       |       |       |                         |                   |             |       |       |       |       |       |       |       |    |    |    |    |    |   |
| Cs | 0.999                                      | 0.941-0.651                                                 | 0.993                   | 0.999                               | 0.987 | 0.992-0.997 | 0.997       | 0.390       | 0.948-0.558 | 0.781 | 0.984 | 0.973 | 0.991 | 0.677-0.310-0.991-0.790 | 0.942             | 0.888-0.092 | 1.000 |       |       |       |       |       |       |    |    |    |    |    |   |
| Ba | 0.978                                      | 0.915-0.553                                                 | 0.985                   | 0.985                               | 0.966 | 0.982-0.973 | 0.971       | 0.394       | 0.926-0.467 | 0.798 | 0.981 | 0.946 | 0.956 | 0.591-0.385-0.967-0.793 | 0.899             | 0.841-0.197 | 0.984 | 1.000 |       |       |       |       |       |    |    |    |    |    |   |
| Hg | 0.494                                      | 0.532-0.235                                                 | 0.498                   | 0.509                               | 0.546 | 0.493-0.485 | 0.493       | 0.463       | 0.466-0.534 | 0.690 | 0.588 | 0.574 | 0.469 | 0.253-0.282-0.419-0.532 | 0.469             | 0.392-0.115 | 0.498 | 0.523 | 1.000 |       |       |       |       |    |    |    |    |    |   |
| Tl | 0.993                                      | 0.945-0.740                                                 | 0.978                   | 0.990                               | 0.982 | 0.970-0.988 | 0.996       | 0.379       | 0.928-0.654 | 0.744 | 0.964 | 0.976 | 0.998 | 0.727-0.213-0.984-0.759 | 0.967             | 0.906       | 0.023 | 0.990 | 0.956 | 0.495 | 1.000 |       |       |    |    |    |    |    |   |
| Pb | 0.767                                      | 0.745-0.894                                                 | 0.712                   | 0.749                               | 0.759 | 0.685-0.748 | 0.785       | 0.274       | 0.638-0.911 | 0.486 | 0.706 | 0.823 | 0.803 | 0.680                   | 0.192-0.734-0.485 | 0.841       | 0.778 | 0.460 | 0.750 | 0.660 | 0.546 | 0.827 | 1.000 |    |    |    |    |    |   |
| U  | 0.752                                      | 0.729-0.955                                                 | 0.700                   | 0.730                               | 0.706 | 0.655-0.730 | 0.775-0.020 | 0.593-0.842 | 0.315       | 0.654 | 0.748 | 0.792 | 0.673 | 0.378-0.740-0.308       | 0.823             | 0.774       | 0.589 | 0.736 | 0.647 | 0.337 | 0.813 | 0.919 | 1.000 |    |    |    |    |    |   |
| Ag | 0.913                                      | 0.839-0.472                                                 | 0.915                   | 0.921                               | 0.940 | 0.932-0.915 | 0.900       | 0.622       | 0.896-0.478 | 0.853 | 0.931 | 0.909 | 0.893 | 0.539-0.530-0.910-0.885 | 0.838             | 0.790-0.322 | 0.911 | 0.910 | 0.581 | 0.891 | 0.656 | 0.528 |       |    |    |    |    |    |   |

**Table S7** Results of the Principal Components Analysis (PCA) (Varimax rotated) of concentration of elements in sediments from the Raša River. Significant correlations ( $r>0.7$ ) are shown in bold.

| Variable                         | Factor 1       | Factor 2       | Factor 3       |
|----------------------------------|----------------|----------------|----------------|
| Ag                               | <b>0.8356</b>  | −0.0042        | 0.4690         |
| Al                               | <b>0.9515</b>  | 0.1565         | 0.2549         |
| As                               | <i>0.6103</i>  | 0.3684         | 0.2979         |
| B                                | <b>0.8737</b>  | 0.2097         | 0.3325         |
| Ba                               | <b>0.9488</b>  | 0.0518         | 0.2428         |
| Ca                               | <b>−0.9552</b> | −0.1512        | −0.2388        |
| Cd                               | <b>0.8526</b>  | 0.3722         | 0.2993         |
| Co                               | <i>0.6629</i>  | −0.1277        | <b>0.7051</b>  |
| Cr                               | 0.2450         | −0.2024        | <b>0.8645</b>  |
| Cs                               | <b>0.9555</b>  | 0.1622         | 0.2362         |
| Cu                               | <b>0.8874</b>  | 0.2466         | 0.3340         |
| Fe                               | <b>0.9148</b>  | 0.0027         | 0.3499         |
| Hg                               | 0.2667         | 0.2294         | <b>0.7407</b>  |
| K                                | <b>0.9553</b>  | 0.0539         | 0.2860         |
| Li                               | <b>0.9513</b>  | 0.1858         | 0.2356         |
| Mg                               | <b>0.9494</b>  | 0.1179         | 0.2660         |
| Mn                               | −0.3492        | <b>−0.8315</b> | −0.3709        |
| Mo                               | <b>−0.7130</b> | 0.1829         | <i>−0.6300</i> |
| Na                               | −0.5601        | <b>−0.7871</b> | 0.0118         |
| Ni                               | <b>0.9175</b>  | 0.0883         | 0.3651         |
| P                                | <b>0.9154</b>  | 0.1590         | 0.3606         |
| Pb                               | 0.5851         | <b>0.7279</b>  | 0.3047         |
| Sb                               | −0.1596        | <b>0.9058</b>  | −0.3686        |
| Se                               | −0.3221        | <b>0.7581</b>  | −0.5524        |
| Sn                               | <b>0.8496</b>  | 0.2892         | 0.1445         |
| Sr                               | <b>−0.9685</b> | −0.1506        | −0.1779        |
| Tl                               | <b>0.9268</b>  | 0.2867         | 0.2406         |
| U                                | <i>0.6505</i>  | <b>0.7554</b>  | −0.0256        |
| V                                | <b>0.9454</b>  | 0.2216         | 0.2298         |
| Zn                               | <b>0.9358</b>  | 0.2530         | 0.2369         |
| Proportion of total variance (%) | 63.0           | 16.0           | 15.1           |

**Table S8** The enrichment factors (*EF*) of metal(loid)s in the sediments.

| Location   |     | Li   | B    | Na   | Mg   | P    | K    | Ca   | V    | Cr   | Fe   | Mn   | Co   | Ni   | Cu   | Zn   | As   | Se   | Sr   | Mo   | Cd   | Sn   | Sb   | Cs   | Ba   | Hg   | Tl   | Pb   | U    | Ag   |
|------------|-----|------|------|------|------|------|------|------|------|------|------|------|------|------|------|------|------|------|------|------|------|------|------|------|------|------|------|------|------|------|
| S2         |     | 2.43 | 0.91 | 0.60 | 1.27 | 1.45 | 1.03 | 0.63 | 1.40 | 1.66 | 1.44 | 0.82 | 1.28 | 1.46 | 1.38 | 1.51 | 0.82 | 0.76 | 1.04 | 0.28 | 1.41 | 1.41 | 0.50 | 3.37 | 1.28 | 0.78 | 0.59 | 0.96 | 1.18 | 0.49 |
| S2         |     | 2.42 | 0.95 | 0.58 | 1.28 | 1.45 | 1.02 | 0.66 | 1.40 | 1.72 | 1.43 | 0.86 | 1.28 | 1.46 | 1.43 | 1.53 | 0.90 | 0.98 | 1.05 | 0.27 | 1.60 | 1.15 | 0.54 | 3.40 | 1.30 | 0.68 | 0.60 | 0.97 | 1.17 | 0.46 |
| S2         |     | 2.43 | 0.95 | 0.60 | 1.29 | 1.45 | 1.03 | 0.67 | 1.39 | 1.68 | 1.46 | 0.91 | 1.26 | 1.45 | 1.26 | 1.49 | 0.87 | 0.86 | 1.05 | 0.28 | 1.56 | 1.07 | 0.50 | 3.38 | 1.32 | 0.67 | 0.58 | 0.89 | 1.17 | 0.45 |
| S2         |     | 2.44 | 0.96 | 0.62 | 1.31 | 1.42 | 1.04 | 0.68 | 1.38 | 1.71 | 1.49 | 0.99 | 1.23 | 1.44 | 1.28 | 1.51 | 1.03 | 0.71 | 1.07 | 0.30 | 1.39 | 1.71 | 0.48 | 3.39 | 1.31 | 0.55 | 0.59 | 0.93 | 1.18 | 0.46 |
| S2         |     | 2.41 | 0.97 | 0.62 | 1.33 | 1.48 | 1.05 | 0.72 | 1.40 | 1.75 | 1.54 | 1.01 | 1.26 | 1.44 | 1.29 | 1.57 | 1.04 | 0.70 | 1.07 | 0.30 | 1.60 | 1.22 | 0.47 | 3.36 | 1.32 | 0.47 | 0.58 | 0.88 | 1.17 | 0.48 |
| S2         |     | 2.46 | 0.99 | 0.65 | 1.33 | 1.42 | 1.07 | 0.73 | 1.41 | 1.72 | 1.56 | 1.11 | 1.28 | 1.48 | 1.32 | 1.51 | 1.00 | 0.75 | 1.11 | 0.28 | 1.49 | 1.13 | 0.49 | 3.39 | 1.32 | 0.56 | 0.57 | 0.93 | 1.17 | 0.48 |
| S1         |     | 2.44 | 1.43 | 1.00 | 1.72 | 1.50 | 1.03 | 1.95 | 1.50 | 2.46 | 1.43 | 1.47 | 1.48 | 1.65 | 1.55 | 1.69 | 1.46 | 4.66 | 2.63 | 2.65 | 1.76 | 1.32 | 1.37 | 3.17 | 1.67 | 0.85 | 0.56 | 1.57 | 2.10 | 0.58 |
| S1         |     | 2.40 | 1.23 | 0.97 | 1.64 | 1.41 | 1.07 | 1.76 | 1.44 | 2.31 | 1.45 | 1.62 | 1.52 | 1.62 | 1.44 | 1.55 | 1.21 | 2.64 | 2.33 | 1.92 | 1.57 | 1.24 | 0.97 | 3.26 | 1.67 | 0.67 | 0.50 | 1.28 | 1.65 | 0.57 |
| S1         |     | 2.37 | 1.20 | 1.04 | 1.58 | 1.46 | 1.07 | 1.64 | 1.37 | 2.28 | 1.46 | 1.78 | 1.49 | 1.59 | 1.40 | 1.48 | 0.92 | 1.84 | 2.25 | 1.62 | 1.20 | 1.00 | 0.75 | 3.17 | 1.65 | 0.76 | 0.46 | 1.17 | 1.43 | 0.61 |
| S1         |     | 2.36 | 1.23 | 1.04 | 1.59 | 1.39 | 1.11 | 1.56 | 1.39 | 2.25 | 1.56 | 1.91 | 1.43 | 1.60 | 1.44 | 1.47 | 0.88 | 1.36 | 2.12 | 1.52 | 1.21 | 1.05 | 0.68 | 3.24 | 1.65 | 0.64 | 0.46 | 1.06 | 1.34 | 0.56 |
| S1         |     | 2.35 | 1.24 | 1.03 | 1.62 | 1.44 | 1.07 | 1.61 | 1.36 | 2.32 | 1.39 | 1.63 | 1.64 | 1.71 | 1.37 | 1.43 | 1.04 | 1.48 | 2.21 | 1.40 | 1.38 | 1.04 | 0.66 | 3.21 | 1.69 | 0.95 | 0.47 | 1.13 | 1.38 | 0.59 |
| S1         |     | 2.38 | 1.24 | 1.10 | 1.66 | 1.53 | 1.13 | 1.66 | 1.39 | 2.62 | 1.48 | 1.66 | 1.72 | 1.73 | 1.42 | 1.52 | 1.03 | 1.22 | 2.35 | 1.42 | 1.39 | 1.00 | 0.69 | 3.20 | 1.65 | 0.75 | 0.46 | 1.17 | 1.36 | 0.60 |
| S1         |     | 2.33 | 1.29 | 1.04 | 1.64 | 1.49 | 1.13 | 1.61 | 1.38 | 2.40 | 1.70 | 1.74 | 1.80 | 1.73 | 1.39 | 1.48 | 1.18 | 1.03 | 2.21 | 1.39 | 1.36 | 1.01 | 0.65 | 3.24 | 1.63 | 0.88 | 0.47 | 1.10 | 1.35 | 0.57 |
| S1         |     | 2.35 | 1.34 | 1.10 | 1.69 | 1.60 | 1.13 | 1.86 | 1.37 | 3.07 | 1.67 | 1.74 | 1.88 | 1.72 | 1.52 | 1.51 | 1.21 | 0.77 | 2.47 | 0.84 | 1.56 | 1.01 | 0.70 | 3.09 | 1.68 | 0.93 | 0.47 | 1.32 | 1.43 | 0.70 |
| S1         |     | 2.32 | 1.35 | 1.13 | 1.66 | 1.57 | 1.14 | 1.78 | 1.40 | 2.80 | 1.86 | 1.79 | 1.87 | 1.75 | 1.51 | 1.54 | 1.47 | 0.78 | 2.51 | 0.73 | 1.45 | 1.01 | 0.70 | 3.17 | 1.68 | 0.94 | 0.47 | 1.25 | 1.42 | 0.60 |
| Raša River | Min | 2.32 | 0.91 | 0.58 | 1.27 | 1.39 | 1.02 | 0.63 | 1.36 | 1.66 | 1.39 | 0.82 | 1.23 | 1.44 | 1.26 | 1.43 | 0.82 | 0.70 | 1.04 | 0.27 | 1.20 | 1.00 | 0.47 | 3.09 | 1.28 | 0.47 | 0.46 | 0.88 | 1.17 | 0.45 |
|            | Max | 2.46 | 1.43 | 1.13 | 1.72 | 1.60 | 1.14 | 1.95 | 1.50 | 3.07 | 1.86 | 1.91 | 1.88 | 1.75 | 1.55 | 1.69 | 1.47 | 4.66 | 2.63 | 2.65 | 1.76 | 1.71 | 1.37 | 3.40 | 1.69 | 0.95 | 0.60 | 1.57 | 2.10 | 0.70 |
|            | AV  | 2.39 | 1.15 | 0.87 | 1.51 | 1.47 | 1.07 | 1.30 | 1.40 | 2.18 | 1.53 | 1.40 | 1.49 | 1.59 | 1.40 | 1.52 | 1.07 | 1.37 | 1.83 | 1.01 | 1.46 | 1.16 | 0.68 | 3.27 | 1.52 | 0.74 | 0.52 | 1.11 | 1.37 | 0.55 |
| S1         | Min | 2.32 | 1.20 | 0.97 | 1.58 | 1.39 | 1.03 | 1.56 | 1.36 | 2.25 | 1.39 | 1.47 | 1.43 | 1.59 | 1.37 | 1.43 | 0.88 | 0.77 | 2.12 | 0.73 | 1.20 | 1.00 | 0.65 | 3.09 | 1.63 | 0.64 | 0.46 | 1.06 | 1.34 | 0.56 |
|            | Max | 2.44 | 1.43 | 1.13 | 1.72 | 1.60 | 1.14 | 1.95 | 1.50 | 3.07 | 1.86 | 1.91 | 1.88 | 1.75 | 1.55 | 1.69 | 1.47 | 4.66 | 2.63 | 2.65 | 1.76 | 1.32 | 1.37 | 3.26 | 1.69 | 0.95 | 0.56 | 1.57 | 2.10 | 0.70 |
|            | AV  | 2.37 | 1.28 | 1.05 | 1.64 | 1.49 | 1.10 | 1.71 | 1.40 | 2.50 | 1.56 | 1.71 | 1.65 | 1.68 | 1.45 | 1.52 | 1.16 | 1.75 | 2.34 | 1.50 | 1.43 | 1.08 | 0.80 | 3.19 | 1.66 | 0.82 | 0.48 | 1.23 | 1.50 | 0.60 |
| S2         | Min | 2.41 | 0.91 | 0.58 | 1.27 | 1.42 | 1.02 | 0.63 | 1.38 | 1.66 | 1.43 | 0.82 | 1.23 | 1.44 | 1.26 | 1.49 | 0.82 | 0.70 | 1.04 | 0.27 | 1.39 | 1.07 | 0.47 | 3.36 | 1.28 | 0.47 | 0.57 | 0.88 | 1.17 | 0.45 |
|            | Max | 2.46 | 0.99 | 0.65 | 1.33 | 1.48 | 1.07 | 0.73 | 1.41 | 1.75 | 1.56 | 1.11 | 1.28 | 1.48 | 1.43 | 1.57 | 1.04 | 0.98 | 1.11 | 0.30 | 1.60 | 1.71 | 0.54 | 3.40 | 1.32 | 0.78 | 0.60 | 0.97 | 1.18 | 0.49 |
|            | AV  | 2.43 | 0.95 | 0.61 | 1.30 | 1.45 | 1.04 | 0.68 | 1.40 | 1.70 | 1.49 | 0.95 | 1.27 | 1.45 | 1.33 | 1.52 | 0.95 | 0.79 | 1.06 | 0.28 | 1.51 | 1.28 | 0.50 | 3.38 | 1.31 | 0.62 | 0.58 | 0.93 | 1.17 | 0.47 |

**Table S9** Index of geo-accumulation ( $I_{\text{geo}}$ ) of metal(loid)s in the sediments.

| Location   |     | Li    | B     | Na    | Mg    | P     | K     | Ca    | V     | Cr    | Fe    | Mn    | Co    | Ni    | Cu    | Zn    | As    | Se    | Sr    | Mo    | Cd    | Sn    | Sb    | Cs   | Ba    | Hg    | Tl    | Pb    | U     | Ag    | Al    |
|------------|-----|-------|-------|-------|-------|-------|-------|-------|-------|-------|-------|-------|-------|-------|-------|-------|-------|-------|-------|-------|-------|-------|-------|------|-------|-------|-------|-------|-------|-------|-------|
| S1         |     | -0.38 | -1.14 | -1.66 | -0.88 | -1.08 | -1.62 | -0.70 | -1.08 | -0.36 | -1.15 | -1.10 | -1.09 | -0.94 | -1.03 | -0.91 | -1.12 | 0.56  | -0.27 | -0.26 | -0.84 | -1.26 | -1.20 | 0.00 | -0.92 | -1.90 | -2.51 | -1.01 | -0.59 | -2.46 | -1.92 |
| S1         |     | -0.29 | -1.26 | -1.59 | -0.84 | -1.05 | -1.46 | -0.74 | -1.02 | -0.34 | -1.02 | -0.85 | -0.95 | -0.86 | -1.03 | -0.92 | -1.27 | -0.15 | -0.33 | -0.61 | -0.90 | -1.24 | -1.60 | 0.15 | -0.81 | -2.12 | -2.54 | -1.19 | -0.83 | -2.36 | -1.81 |
| S1         |     | -0.27 | -1.24 | -1.45 | -0.85 | -0.96 | -1.41 | -0.80 | -1.06 | -0.32 | -0.97 | -0.68 | -0.94 | -0.84 | -1.02 | -0.95 | -1.63 | -0.63 | -0.34 | -0.81 | -1.25 | -1.51 | -1.92 | 0.15 | -0.79 | -1.91 | -2.62 | -1.28 | -1.00 | -2.23 | -1.77 |
| S1         |     | -0.22 | -1.16 | -1.41 | -0.79 | -0.99 | -1.31 | -0.82 | -0.98 | -0.29 | -0.82 | -0.52 | -0.94 | -0.78 | -0.94 | -0.90 | -1.65 | -1.01 | -0.38 | -0.85 | -1.19 | -1.39 | -2.01 | 0.24 | -0.74 | -2.10 | -2.58 | -1.37 | -1.03 | -2.29 | -1.72 |
| S1         |     | -0.23 | -1.15 | -1.43 | -0.77 | -0.94 | -1.36 | -0.78 | -1.02 | -0.25 | -0.99 | -0.76 | -0.75 | -0.69 | -1.00 | -0.95 | -1.41 | -0.90 | -0.32 | -0.98 | -1.00 | -1.40 | -2.07 | 0.22 | -0.71 | -1.54 | -2.56 | -1.28 | -1.00 | -2.23 | -1.73 |
| S1         |     | -0.27 | -1.21 | -1.39 | -0.79 | -0.91 | -1.35 | -0.79 | -1.04 | -0.13 | -0.95 | -0.79 | -0.74 | -0.73 | -1.02 | -0.92 | -1.48 | -1.24 | -0.29 | -1.02 | -1.04 | -1.52 | -2.05 | 0.15 | -0.80 | -1.95 | -2.63 | -1.30 | -1.08 | -2.25 | -1.78 |
| S1         |     | -0.25 | -1.10 | -1.41 | -0.75 | -0.89 | -1.30 | -0.79 | -1.01 | -0.21 | -0.70 | -0.67 | -0.62 | -0.68 | -0.99 | -0.90 | -1.23 | -1.43 | -0.33 | -0.99 | -1.02 | -1.45 | -2.10 | 0.23 | -0.76 | -1.65 | -2.57 | -1.33 | -1.03 | -2.27 | -1.73 |
| S1         |     | -0.37 | -1.18 | -1.46 | -0.84 | -0.92 | -1.43 | -0.70 | -1.15 | 0.02  | -0.86 | -0.80 | -0.69 | -0.81 | -1.00 | -1.00 | -1.32 | -1.98 | -0.29 | -1.86 | -0.96 | -1.58 | -2.11 | 0.03 | -0.85 | -1.70 | -2.68 | -1.20 | -1.09 | -2.12 | -1.86 |
| S1         |     | -0.38 | -1.16 | -1.42 | -0.86 | -0.94 | -1.41 | -0.76 | -1.11 | -0.11 | -0.70 | -0.75 | -0.69 | -0.79 | -0.99 | -0.97 | -1.03 | -1.95 | -0.26 | -2.04 | -1.05 | -1.58 | -2.10 | 0.07 | -0.84 | -1.68 | -2.70 | -1.27 | -1.09 | -2.32 | -1.85 |
| S2         |     | 0.42  | -0.99 | -1.61 | -0.52 | -0.32 | -0.83 | -1.52 | -0.38 | -0.13 | -0.34 | -1.15 | -0.51 | -0.32 | -0.40 | -0.27 | -1.14 | -1.27 | -0.81 | -2.71 | -0.37 | -0.37 | -1.86 | 0.89 | -0.51 | -1.23 | -1.63 | -0.91 | -0.62 | -1.90 | -1.13 |
| S2         |     | 0.42  | -0.94 | -1.65 | -0.50 | -0.32 | -0.82 | -1.46 | -0.37 | -0.08 | -0.34 | -1.08 | -0.50 | -0.31 | -0.33 | -0.24 | -1.00 | -0.89 | -0.79 | -2.77 | -0.18 | -0.66 | -1.73 | 0.91 | -0.47 | -1.42 | -1.60 | -0.90 | -0.63 | -1.98 | -1.12 |
| S2         |     | 0.41  | -0.95 | -1.62 | -0.51 | -0.34 | -0.83 | -1.46 | -0.40 | -0.13 | -0.34 | -1.02 | -0.54 | -0.34 | -0.54 | -0.30 | -1.08 | -1.10 | -0.81 | -2.74 | -0.24 | -0.78 | -1.87 | 0.88 | -0.48 | -1.46 | -1.67 | -1.04 | -0.65 | -2.02 | -1.14 |
| S2         |     | 0.39  | -0.97 | -1.60 | -0.51 | -0.39 | -0.85 | -1.45 | -0.44 | -0.13 | -0.32 | -0.91 | -0.60 | -0.37 | -0.54 | -0.31 | -0.85 | -1.39 | -0.80 | -2.63 | -0.42 | -0.12 | -1.95 | 0.86 | -0.51 | -1.75 | -1.67 | -1.01 | -0.66 | -2.01 | -1.16 |
| S2         |     | 0.34  | -0.97 | -1.62 | -0.52 | -0.37 | -0.86 | -1.39 | -0.44 | -0.12 | -0.30 | -0.92 | -0.59 | -0.40 | -0.56 | -0.27 | -0.87 | -1.43 | -0.83 | -2.68 | -0.25 | -0.64 | -2.03 | 0.82 | -0.53 | -2.01 | -1.71 | -1.11 | -0.70 | -1.99 | -1.19 |
| S2         |     | 0.34  | -0.97 | -1.57 | -0.55 | -0.45 | -0.86 | -1.40 | -0.46 | -0.18 | -0.31 | -0.81 | -0.60 | -0.39 | -0.55 | -0.36 | -0.95 | -1.38 | -0.81 | -2.79 | -0.38 | -0.78 | -1.98 | 0.81 | -0.56 | -1.81 | -1.77 | -1.07 | -0.73 | -2.01 | -1.22 |
| Raša River | Min | -0.38 | -1.26 | -1.66 | -0.88 | -1.08 | -1.62 | -1.52 | -1.15 | -0.36 | -1.15 | -1.15 | -1.09 | -0.94 | -1.03 | -1.00 | -1.65 | -1.98 | -0.83 | -2.79 | -1.25 | -1.58 | -2.11 | 0.00 | -0.92 | -2.12 | -2.70 | -1.37 | -1.09 | -2.46 | -1.92 |
|            | Max | 0.42  | -0.94 | -1.39 | -0.50 | -0.32 | -0.82 | -0.70 | -0.37 | 0.02  | -0.30 | -0.52 | -0.50 | -0.31 | -0.33 | -0.24 | -0.85 | 0.56  | -0.26 | -0.26 | -0.18 | -0.12 | -1.20 | 0.91 | -0.47 | -1.23 | -1.60 | -0.90 | -0.59 | -1.90 | -1.12 |
|            | AV  | -0.02 | -1.09 | -1.53 | -0.70 | -0.72 | -1.18 | -1.04 | -0.80 | -0.18 | -0.67 | -0.85 | -0.72 | -0.62 | -0.80 | -0.68 | -1.20 | -1.08 | -0.51 | -1.72 | -0.74 | -1.09 | -1.91 | 0.43 | -0.69 | -1.75 | -2.23 | -1.15 | -0.85 | -2.16 | -1.54 |
| S1         | Min | -0.38 | -1.26 | -1.66 | -0.88 | -1.08 | -1.62 | -1.52 | -1.15 | -0.36 | -1.15 | -1.15 | -1.09 | -0.94 | -1.03 | -1.00 | -1.65 | -1.98 | -0.83 | -2.79 | -1.25 | -1.58 | -2.11 | 0.00 | -0.92 | -2.12 | -2.70 | -1.37 | -1.09 | -2.46 | -1.92 |
|            | Max | 0.42  | -0.94 | -1.39 | -0.50 | -0.32 | -0.82 | -0.70 | -0.37 | 0.02  | -0.30 | -0.52 | -0.50 | -0.31 | -0.33 | -0.24 | -0.85 | 0.56  | -0.26 | -0.26 | -0.18 | -0.12 | -1.20 | 0.24 | -0.47 | -1.23 | -1.60 | -0.90 | -0.59 | -1.90 | -1.12 |
|            | AV  | -0.02 | -1.09 | -1.53 | -0.70 | -0.72 | -1.18 | -1.04 | -0.80 | -0.18 | -0.67 | -0.85 | -0.72 | -0.62 | -0.80 | -0.68 | -1.20 | -1.08 | -0.51 | -1.72 | -0.74 | -1.09 | -1.91 | 0.14 | -0.69 | -1.75 | -2.23 | -1.15 | -0.85 | -2.16 | -1.54 |
| S2         | Min | -0.38 | -1.26 | -1.66 | -0.88 | -1.08 | -1.62 | -0.82 | -1.15 | -0.36 | -1.15 | -1.10 | -1.09 | -0.94 | -1.03 | -1.00 | -1.65 | -1.98 | -0.38 | -2.04 | -1.25 | -1.58 | -2.11 | 0.81 | -0.92 | -2.12 | -2.70 | -1.37 | -1.09 | -2.46 | -1.92 |
|            | Max | -0.22 | -1.10 | -1.39 | -0.75 | -0.89 | -1.30 | -0.70 | -0.98 | 0.02  | -0.70 | -0.52 | -0.62 | -0.68 | -0.94 | -0.90 | -1.03 | 0.56  | -0.26 | -0.26 | -0.84 | -1.24 | -1.20 | 0.91 | -0.71 | -1.54 | -2.51 | -1.01 | -0.59 | -2.12 | -1.72 |
|            | AV  | -0.29 | -1.18 | -1.47 | -0.82 | -0.97 | -1.40 | -0.76 | -1.05 | -0.22 | -0.90 | -0.77 | -0.82 | -0.79 | -1.00 | -0.94 | -1.35 | -0.97 | -0.31 | -1.05 | -1.03 | -1.44 | -1.91 | 0.86 | -0.80 | -1.84 | -2.60 | -1.25 | -0.97 | -2.28 | -1.80 |



**Table S10** Pollution index (PLI) of metal(loid)s in the sediments.

| Location   |     | C <sub>i</sub> /B <sub>i</sub> |      |      |      |      |      |      |      |      |      |      |      |      |      |      |      |      |      |      |      |      |      |      |      |      |      |      |      | Produc | PLI  |         |        |
|------------|-----|--------------------------------|------|------|------|------|------|------|------|------|------|------|------|------|------|------|------|------|------|------|------|------|------|------|------|------|------|------|------|--------|------|---------|--------|
|            |     | Na                             | Mg   | P    | K    | Ca   | V    | Cr   | Fe   | Mn   | Co   | Ni   | Cu   | Zn   | As   | Sr   | Ba   | Hg   | Pb   | U    | Al   | Li   | B    | Se   | Mo   | Cd   | Sn   | Sb   | Cs   | Tl     | Ag   | t Ci/Bi | (n=30) |
| S2         |     | 0.60                           | 1.17 | 1.52 | 0.92 | 0.87 | 1.31 | 1.56 | 1.33 | 0.81 | 1.27 | 1.39 | 1.30 | 1.47 | 0.86 | 1.29 | 1.24 | 1.04 | 0.97 | 1.61 | 0.82 | 2.75 | 0.75 | 0.97 | 0.23 | 1.74 | 2.46 | 0.41 | 2.78 | 0.48   | 0.40 | 5.14    | 1.06   |
| S2         |     | 0.59                           | 1.18 | 1.52 | 0.92 | 0.90 | 1.32 | 1.62 | 1.34 | 0.85 | 1.27 | 1.39 | 1.36 | 1.49 | 0.95 | 1.31 | 1.27 | 0.91 | 0.99 | 1.59 | 0.83 | 2.76 | 0.78 | 1.26 | 0.22 | 1.99 | 2.02 | 0.45 | 2.82 | 0.49   | 0.38 | 8.30    | 1.07   |
| S2         |     | 0.60                           | 1.17 | 1.51 | 0.91 | 0.91 | 1.29 | 1.56 | 1.34 | 0.88 | 1.24 | 1.36 | 1.17 | 1.44 | 0.90 | 1.28 | 1.26 | 0.89 | 0.89 | 1.57 | 0.82 | 2.73 | 0.78 | 1.09 | 0.22 | 1.91 | 1.85 | 0.41 | 2.76 | 0.47   | 0.37 | 3.25    | 1.04   |
| S2         |     | 0.61                           | 1.17 | 1.45 | 0.91 | 0.91 | 1.26 | 1.57 | 1.35 | 0.95 | 1.19 | 1.34 | 1.18 | 1.43 | 1.06 | 1.30 | 1.23 | 0.72 | 0.91 | 1.56 | 0.80 | 2.69 | 0.77 | 0.89 | 0.24 | 1.68 | 2.93 | 0.39 | 2.73 | 0.47   | 0.37 | 3.29    | 1.04   |
| S2         |     | 0.60                           | 1.17 | 1.48 | 0.90 | 0.95 | 1.25 | 1.57 | 1.37 | 0.95 | 1.20 | 1.31 | 1.16 | 1.46 | 1.04 | 1.27 | 1.22 | 0.61 | 0.85 | 1.51 | 0.79 | 2.62 | 0.77 | 0.86 | 0.23 | 1.90 | 2.05 | 0.37 | 2.65 | 0.46   | 0.38 | 1.60    | 1.02   |
| S2         |     | 0.62                           | 1.14 | 1.40 | 0.90 | 0.94 | 1.24 | 1.51 | 1.36 | 1.02 | 1.19 | 1.32 | 1.17 | 1.37 | 0.99 | 1.28 | 1.20 | 0.70 | 0.88 | 1.49 | 0.77 | 2.61 | 0.76 | 0.90 | 0.22 | 1.73 | 1.86 | 0.38 | 2.62 | 0.44   | 0.37 | 1.19    | 1.01   |
| S1         |     | 0.58                           | 0.91 | 0.90 | 0.53 | 1.54 | 0.81 | 1.33 | 0.76 | 0.83 | 0.85 | 0.90 | 0.84 | 0.94 | 0.88 | 1.87 | 0.93 | 0.66 | 0.91 | 1.64 | 0.47 | 1.59 | 0.68 | 3.44 | 1.25 | 1.25 | 1.33 | 0.65 | 1.50 | 0.26   | 0.27 | 0.06    | 0.91   |
| S1         |     | 0.61                           | 0.94 | 0.92 | 0.59 | 1.49 | 0.84 | 1.35 | 0.84 | 0.99 | 0.93 | 0.96 | 0.84 | 0.94 | 0.79 | 1.79 | 1.00 | 0.56 | 0.80 | 1.39 | 0.51 | 1.69 | 0.63 | 2.10 | 0.98 | 1.20 | 1.35 | 0.50 | 1.67 | 0.26   | 0.29 | 0.03    | 0.86   |
| S1         |     | 0.67                           | 0.93 | 0.98 | 0.61 | 1.43 | 0.82 | 1.37 | 0.86 | 1.12 | 0.94 | 0.97 | 0.84 | 0.92 | 0.62 | 1.78 | 1.02 | 0.65 | 0.76 | 1.24 | 0.53 | 1.71 | 0.63 | 1.51 | 0.86 | 0.95 | 1.12 | 0.40 | 1.67 | 0.24   | 0.32 | 0.01    | 0.86   |
| S1         |     | 0.69                           | 0.97 | 0.96 | 0.66 | 1.41 | 0.86 | 1.40 | 0.96 | 1.24 | 0.94 | 1.01 | 0.90 | 0.94 | 0.61 | 1.73 | 1.06 | 0.57 | 0.71 | 1.20 | 0.55 | 1.77 | 0.67 | 1.16 | 0.83 | 0.99 | 1.22 | 0.37 | 1.77 | 0.25   | 0.31 | 0.01    | 0.87   |
| S1         |     | 0.68                           | 0.98 | 0.99 | 0.63 | 1.45 | 0.84 | 1.44 | 0.85 | 1.05 | 1.07 | 1.07 | 0.85 | 0.91 | 0.72 | 1.80 | 1.08 | 0.84 | 0.75 | 1.24 | 0.54 | 1.76 | 0.68 | 1.25 | 0.76 | 1.12 | 1.21 | 0.36 | 1.75 | 0.25   | 0.32 | 0.03    | 0.89   |
| S1         |     | 0.70                           | 0.97 | 1.02 | 0.64 | 1.44 | 0.83 | 1.56 | 0.87 | 1.03 | 1.08 | 1.04 | 0.85 | 0.93 | 0.68 | 1.84 | 1.01 | 0.63 | 0.75 | 1.17 | 0.52 | 1.71 | 0.65 | 0.99 | 0.74 | 1.09 | 1.12 | 0.36 | 1.67 | 0.24   | 0.32 | 0.01    | 0.86   |
| S1         |     | 0.69                           | 0.99 | 1.02 | 0.66 | 1.44 | 0.85 | 1.48 | 1.04 | 1.12 | 1.17 | 1.08 | 0.86 | 0.94 | 0.81 | 1.80 | 1.04 | 0.78 | 0.73 | 1.21 | 0.54 | 1.73 | 0.70 | 0.87 | 0.76 | 1.11 | 1.17 | 0.35 | 1.76 | 0.25   | 0.31 | 0.03    | 0.89   |
| S1         |     | 0.67                           | 0.93 | 1.00 | 0.61 | 1.53 | 0.77 | 1.73 | 0.93 | 1.02 | 1.12 | 0.98 | 0.86 | 0.88 | 0.76 | 1.84 | 0.98 | 0.75 | 0.80 | 1.16 | 0.50 | 1.60 | 0.66 | 0.59 | 0.41 | 1.16 | 1.07 | 0.35 | 1.53 | 0.23   | 0.34 | 0.00    | 0.83   |
| S1         |     | 0.69                           | 0.92 | 0.99 | 0.61 | 1.47 | 0.79 | 1.59 | 1.04 | 1.06 | 1.12 | 1.00 | 0.86 | 0.90 | 0.93 | 1.88 | 0.98 | 0.76 | 0.76 | 1.16 | 0.50 | 1.59 | 0.67 | 0.60 | 0.36 | 1.08 | 1.06 | 0.35 | 1.57 | 0.23   | 0.30 | 0.00    | 0.83   |
| Raša River | Min |                                |      |      |      |      |      |      |      |      |      |      |      |      |      |      |      |      |      |      |      |      |      |      |      |      |      |      |      | 0.00   | 0.83 |         |        |
|            | Max |                                |      |      |      |      |      |      |      |      |      |      |      |      |      |      |      |      |      |      |      |      |      |      |      |      |      |      |      | 8.30   | 1.07 |         |        |
|            | AV  |                                |      |      |      |      |      |      |      |      |      |      |      |      |      |      |      |      |      |      |      |      |      |      |      |      |      |      |      | 1.53   | 0.94 |         |        |
| S1         | Min |                                |      |      |      |      |      |      |      |      |      |      |      |      |      |      |      |      |      |      |      |      |      |      |      |      |      |      |      | 0.004  | 0.83 |         |        |
|            | Max |                                |      |      |      |      |      |      |      |      |      |      |      |      |      |      |      |      |      |      |      |      |      |      |      |      |      |      |      | 0.062  | 0.91 |         |        |
|            | AV  |                                |      |      |      |      |      |      |      |      |      |      |      |      |      |      |      |      |      |      |      |      |      |      |      |      |      |      |      | 0.021  | 0.87 |         |        |
| S2         | Min |                                |      |      |      |      |      |      |      |      |      |      |      |      |      |      |      |      |      |      |      |      |      |      |      |      |      |      |      | 1.19   | 1.01 |         |        |
|            | Max |                                |      |      |      |      |      |      |      |      |      |      |      |      |      |      |      |      |      |      |      |      |      |      |      |      |      |      |      | 8.30   | 1.07 |         |        |
|            | AV  |                                |      |      |      |      |      |      |      |      |      |      |      |      |      |      |      |      |      |      |      |      |      |      |      |      |      |      |      | 3.80   | 1.04 |         |        |

**Table S11**  $E_r^i$  and  $RI$  of metal(loid)s in the sediments

| Location   |     | $E_r^i$ |      |      |      |      |      |      |      |      |      |      | RI   |     |
|------------|-----|---------|------|------|------|------|------|------|------|------|------|------|------|-----|
|            |     | V       | Cr   | Mn   | Co   | Ni   | Cu   | Zn   | As   | Ba   | Hg   | Pb   |      | Cd  |
| S1         |     | 1.61    | 2.67 | 0.83 | 4.23 | 4.51 | 4.19 | 0.94 | 8.79 | 0.93 | 26.2 | 4.56 | 37.6 | 97  |
| S1         |     | 1.68    | 2.70 | 0.99 | 4.67 | 4.78 | 4.20 | 0.94 | 7.89 | 1.00 | 22.4 | 4.02 | 36.1 | 91  |
| S1         |     | 1.64    | 2.74 | 1.12 | 4.71 | 4.84 | 4.22 | 0.92 | 6.17 | 1.02 | 26.0 | 3.78 | 28.5 | 86  |
| S1         |     | 1.72    | 2.81 | 1.24 | 4.69 | 5.03 | 4.48 | 0.94 | 6.10 | 1.06 | 22.7 | 3.54 | 29.6 | 84  |
| S1         |     | 1.68    | 2.88 | 1.05 | 5.35 | 5.35 | 4.27 | 0.91 | 7.21 | 1.08 | 33.7 | 3.77 | 33.7 | 101 |
| S1         |     | 1.66    | 3.12 | 1.03 | 5.38 | 5.20 | 4.23 | 0.93 | 6.84 | 1.01 | 25.3 | 3.73 | 32.7 | 91  |
| S1         |     | 1.70    | 2.97 | 1.12 | 5.87 | 5.41 | 4.32 | 0.94 | 8.13 | 1.04 | 31.0 | 3.64 | 33.2 | 99  |
| S1         |     | 1.54    | 3.46 | 1.02 | 5.58 | 4.92 | 4.29 | 0.88 | 7.62 | 0.98 | 30.1 | 4.00 | 34.7 | 99  |
| S1         |     | 1.58    | 3.17 | 1.06 | 5.60 | 5.01 | 4.30 | 0.90 | 9.33 | 0.98 | 30.4 | 3.81 | 32.5 | 99  |
| S2         |     | 2.63    | 3.12 | 0.81 | 6.34 | 6.95 | 6.48 | 1.47 | 8.64 | 1.24 | 41.6 | 4.87 | 52.2 | 136 |
| S2         |     | 2.65    | 3.25 | 0.85 | 6.37 | 6.96 | 6.79 | 1.49 | 9.52 | 1.27 | 36.6 | 4.93 | 59.8 | 140 |
| S2         |     | 2.59    | 3.13 | 0.88 | 6.19 | 6.81 | 5.87 | 1.44 | 9.04 | 1.26 | 35.6 | 4.47 | 57.2 | 134 |
| S2         |     | 2.52    | 3.13 | 0.95 | 5.96 | 6.69 | 5.88 | 1.43 | 10.6 | 1.23 | 29.0 | 4.57 | 50.4 | 122 |
| S2         |     | 2.51    | 3.14 | 0.95 | 6.00 | 6.55 | 5.80 | 1.46 | 10.5 | 1.22 | 24.3 | 4.25 | 56.9 | 124 |
| S2         |     | 2.48    | 3.02 | 1.02 | 5.97 | 6.59 | 5.84 | 1.37 | 9.87 | 1.20 | 27.9 | 4.38 | 51.9 | 122 |
| Raša River | Min | 1.54    | 2.67 | 0.81 | 4.23 | 4.51 | 4.19 | 0.88 | 6.10 | 0.93 | 22.4 | 3.54 | 28.5 | 84  |
|            | Max | 2.65    | 3.46 | 1.24 | 6.37 | 6.96 | 6.79 | 1.49 | 10.6 | 1.27 | 41.6 | 4.93 | 59.8 | 140 |
|            | AV  | 2.01    | 3.02 | 0.99 | 5.53 | 5.71 | 5.01 | 1.13 | 8.41 | 1.10 | 29.5 | 4.15 | 41.8 | 108 |
| S1         | Min | 1.54    | 2.67 | 0.83 | 4.23 | 4.51 | 4.19 | 0.88 | 6.10 | 0.93 | 22.4 | 3.54 | 28.5 | 84  |
|            | Max | 1.72    | 3.46 | 1.24 | 5.87 | 5.41 | 4.48 | 0.94 | 9.33 | 1.08 | 33.7 | 4.56 | 37.6 | 101 |
|            | AV  | 1.65    | 2.95 | 1.05 | 5.12 | 5.01 | 4.28 | 0.92 | 7.57 | 1.01 | 27.6 | 3.87 | 33.2 | 94  |
| S2         | Min | 2.48    | 3.02 | 0.81 | 5.96 | 6.55 | 5.80 | 1.37 | 8.64 | 1.20 | 24.3 | 4.25 | 50.4 | 122 |
|            | Max | 2.65    | 3.25 | 1.02 | 6.37 | 6.96 | 6.79 | 1.49 | 10.6 | 1.27 | 41.6 | 4.93 | 59.8 | 140 |
|            | AV  | 2.56    | 3.13 | 0.91 | 6.14 | 6.76 | 6.11 | 1.44 | 9.68 | 1.24 | 32.5 | 4.58 | 54.7 | 130 |

**Table S12** Comparison of average concentrations [arithmetic mean (range) or arithmetic mean  $\pm$  standard deviation] of potentially toxic elements [in mg kg<sup>-1</sup> or  $\mu$ g kg<sup>-1</sup> wet mass (wm)] in muscle tissue of six freshwater fish species from the Raša River (Istria, Croatia) with the literature data for similar freshwater species from European rivers, lakes and reservoirs

| Species      | Country | Location         | As<br>(mg<br>kg <sup>-1</sup> ) | Cd<br>( $\mu$ g kg <sup>-1</sup> ) | Co<br>(mg<br>kg <sup>-1</sup> ) | Cr<br>( $\mu$ g kg <sup>-1</sup> ) | Cu<br>(mg<br>kg <sup>-1</sup> ) | Hg<br>(mg<br>kg <sup>-1</sup> ) | Mn<br>(mg<br>kg <sup>-1</sup> ) | Ni<br>( $\mu$ g kg <sup>-1</sup> ) | Pb<br>( $\mu$ g kg <sup>-1</sup> ) | Se<br>(mg<br>kg <sup>-1</sup> ) | Zn<br>(mg<br>kg <sup>-1</sup> ) | Reference |
|--------------|---------|------------------|---------------------------------|------------------------------------|---------------------------------|------------------------------------|---------------------------------|---------------------------------|---------------------------------|------------------------------------|------------------------------------|---------------------------------|---------------------------------|-----------|
| <i>Eel</i>   |         |                  |                                 |                                    |                                 |                                    |                                 |                                 |                                 |                                    |                                    |                                 |                                 |           |
| European eel | UK      | Mersey estuary   | 1.1<br>(0.14 -                  |                                    |                                 |                                    | 1.06<br>(0.22–4.1               | 1.33<br>(0.15–2.5               |                                 |                                    | 2.2<br>(0.3–4.7)                   |                                 | 25.7<br>(16.0–32.               | [80]      |
|              |         | 57 sites         |                                 |                                    |                                 |                                    |                                 | 0.24–0.3<br>9                   |                                 |                                    |                                    |                                 |                                 | [81]      |
|              |         | River Yare       |                                 |                                    |                                 |                                    | 0.26<br>(0.06–0.5               |                                 |                                 |                                    |                                    |                                 |                                 | [82]      |
| Belgium      |         | Ormesby Broad    |                                 |                                    |                                 |                                    | 0.10<br>(0.02–0.2               |                                 |                                 |                                    |                                    |                                 |                                 |           |
|              |         | Yser             | 0.14                            | 2.45                               |                                 | 296                                | 0.52                            | 0.15                            |                                 | 46.52                              | 41.7                               | 0.329                           | 23.9                            | [27]      |
|              |         | Meuse            | 0.37                            | 19.5                               |                                 | 362                                | 0.49                            | 0.17                            |                                 | 65.7                               | 37.6                               | 0.664                           | 26.3                            |           |
|              |         | Scheldt          | 0.31                            | 2.99                               |                                 | 174                                | 0.64                            | 0.09                            |                                 | 46.5                               | 52.8                               | 1.02                            | 25.1                            |           |
|              |         | 357 locations    |                                 | 11.7<br>(<DL -                     |                                 |                                    |                                 | 114<br>(0.01-                   |                                 | 186<br>(<DL -                      | 57<br>(<DL -                       |                                 |                                 | [83]      |
|              |         | 365 locations    | 0.17<br>(0.01–1.81)             | 15.8<br>(1.0–2,47                  |                                 | 255<br>(17.5–13,690)               | 0.91<br>(0.05–43                | 0.12<br>(0.01–1.1               |                                 | 208<br>(5.0–16,3                   | 81.2<br>(1.0–3,45                  | 0.75<br>(0.03–5.                | 25.9<br>(1.2–243)               | [84]      |
|              |         | 11 river basins  | 0.095<br>(0.01–1.88)            | 7.7<br>(0.25–55                    |                                 | 200<br>(45.5–6,1                   | 0.46<br>(0.06–6.5               | 0.10<br>(0.01–0.7               |                                 | 57<br>(1.16–16,                    | 23.6<br>(1.00–66                   | 0.66<br>(0.10–4.                | 20.2<br>(1.20–24                | [85]      |
|              |         | 23 locations     | 0.08 $\pm$ 0.01                 | 4.3 $\pm$ 0.2                      | 9.7 $\pm$ 1.1                   | 44.7 $\pm$ 9.7                     | 0.13 $\pm$ 0.04                 | 0.15 $\pm$ 0.01                 | 0.2 $\pm$ 0.0                   | 179 $\pm$ 14.7                     | 62.3 $\pm$ 1.4                     |                                 | 16.5 $\pm$ 0.5                  | [86]      |
| Germany      |         | Rhine            |                                 |                                    |                                 |                                    |                                 | 0.05–0.4                        |                                 |                                    |                                    |                                 |                                 | [87]      |
| Poland       |         | 5 regions        | 0.03–0.78                       | 1–46                               |                                 |                                    | 0.12–0.51                       | 0.10–0.49                       |                                 |                                    | <DL–28                             | 0.10–0.31                       | 15.9–32.0                       | [88]      |
| Latvia       |         | 5 lakes          | 0.02–0.44                       | 4–15                               |                                 | 230–550                            | 0.58–1.27                       | 0.071–0.64                      | 0.11–0.60                       | 40–270                             | 4–84                               | 0.27–0.56                       | 24–47                           | [89]      |
| Spain        |         | Turia River      | 0.228<br>(0.024–0.993)          | 4.9<br>(2.96–7.92)                 |                                 |                                    | 0.977<br>(0.222–0.977)          |                                 |                                 |                                    | 102<br>(22.3–258)                  |                                 | 17.0<br>(12.6–17.0)             | [51]      |
|              |         | Odiel. Cadiz     | 0.52–2.91                       | 15–50                              |                                 | 143–368                            | 0.5–1.5                         | 0.010–0.023                     | 4.71–14.1                       | 15–20                              | 30–90                              |                                 | 10.1–13.0                       | [55]      |
|              |         | wild ecosystem   |                                 | 1–147                              |                                 |                                    | 0.122–0.444                     | 0.110–0.803                     |                                 |                                    | 0.95–204                           |                                 |                                 | [90]      |
|              |         | Albufera Lake    |                                 | <DL                                |                                 |                                    | 0.18–0.33                       | 0.02–0.24                       | 0.10–1.46                       |                                    | 20–230                             |                                 | 12.8–36.8                       | [91]      |
| Portugal     |         | Mar Menor Lagoon |                                 | 2<br>(<DL–47)                      |                                 |                                    |                                 | 0.01<br>(<DL–0.18)              |                                 |                                    | 93<br>(<DL–1,434)                  | 0.30<br>(<DL–1.54)              |                                 | [92]      |
|              |         | Ria de Aveiro    |                                 | 8.98–42.                           |                                 |                                    | 0.637–1.                        |                                 |                                 | 157–394                            | 44.0–78.                           |                                 | 14.0–23.                        | [54]      |
|              |         |                  | 1.27<br>(0.39–3.07)             | 3.0<br>(1.0–11.0)                  |                                 | 738<br>(382–1,527)                 | 0.22<br>(0.13–0.57)             | 0.14<br>(0.06–0.29)             |                                 | 156<br>(85–283)                    | 23<br>(8–96)                       |                                 | 13.9<br>(8.85–21.6)             | [93]      |
| France       |         | Gironde Estuary  |                                 | <LOD                               |                                 |                                    | 0.15 $\pm$ 0.02                 | 0.17 $\pm$ 0.02                 |                                 |                                    |                                    |                                 | 10.2 $\pm$ 1.0                  | [52]      |
|              |         | Nat. Reserve     | 38.1–1,586                      | ND                                 | 2.38–16.7                       | 336–869                            | 0.04–0.12                       | 0.03–0.16                       | 0.02–0.10                       | 14.3–293                           | 45.2–326                           |                                 | 2.95–14.7                       | [94]      |

**Table S12** (continued)

| Species      | Country | Location        | As<br>(mg<br>kg <sup>-1</sup> ) | Cd<br>( $\mu$ g kg <sup>-1</sup> ) | Co<br>(mg<br>kg <sup>-1</sup> ) | Cr<br>( $\mu$ g kg <sup>-1</sup> ) | Cu<br>(mg<br>kg <sup>-1</sup> ) | Hg<br>(mg<br>kg <sup>-1</sup> ) | Mn<br>(mg<br>kg <sup>-1</sup> ) | Ni<br>( $\mu$ g kg <sup>-1</sup> ) | Pb<br>( $\mu$ g kg <sup>-1</sup> ) | Se<br>(mg<br>kg <sup>-1</sup> ) | Zn<br>(mg<br>kg <sup>-1</sup> ) | Reference |
|--------------|---------|-----------------|---------------------------------|------------------------------------|---------------------------------|------------------------------------|---------------------------------|---------------------------------|---------------------------------|------------------------------------|------------------------------------|---------------------------------|---------------------------------|-----------|
| European eel | France  | 5 fishing areas | 0.10<br>(0.03–0.65)             | 11<br>(1–71)                       |                                 |                                    |                                 | 0.20<br>(0.05–0.59)             |                                 |                                    | 24<br>(1–159)                      |                                 |                                 | [46]      |
|              | Italy   | Vargano Lagoon  | 0.5                             | 70–80                              |                                 |                                    | 0.4–0.5                         | 0.01–0.02                       |                                 |                                    | 30–50                              |                                 | 46.0–47.7                       | [95]      |
|              |         | Lago di Garda   |                                 |                                    |                                 |                                    |                                 | 0.23<br>(0.07–0.47)             |                                 | 410<br>(10–670)                    | 500<br>(1–1,220)                   |                                 |                                 | [96]      |
|              |         | Fogliano Lagoon |                                 |                                    |                                 |                                    | 0.29                            | 0.31                            |                                 |                                    |                                    |                                 | 30.4                            | [97]      |

|  |                            |             |             |             |             |             |             |             |            |             |             |             |                   |
|--|----------------------------|-------------|-------------|-------------|-------------|-------------|-------------|-------------|------------|-------------|-------------|-------------|-------------------|
|  |                            |             |             |             |             | (0.09–0.49) | (0.08–0.57) |             |            |             |             | (18.0–47.2) |                   |
|  | Caprolace Lagoon           |             |             |             |             | 0.31        | 0.30        |             |            |             |             | 28.9        |                   |
|  |                            |             |             |             |             | (0.17–0.54) | (0.07–0.72) |             |            |             |             | (19.2–51.2) |                   |
|  | Turkey Asi River           | 70±30       |             | 60±30       |             | 0.9±0.18    | 0.26±0.1    | 0.29±0.     |            | 560±120     |             | 12.5±1.3    | [98]              |
|  | Hungary Lake Balaton       | 570–1,240   |             |             |             | 2.18–2.38   | 0.07–0.12   |             |            | 360–410     |             | 97.3–105    | [99]              |
|  | B&H NP                     | 0.09        | 20          |             |             |             | 0.16        |             |            | 123         |             |             | [53]              |
|  | Hutovo Blato               | (0.08–0.10) | (16–26)     |             |             |             | (0.15–0.16) |             |            | (117–128)   |             |             |                   |
|  | Montenegro Lake Skadar     | 0.29        | <DL         | <DL         | 69          | 0.84        | 0.14        | 0.64        | 38         | <DL         |             | 15.1        | [47]              |
|  |                            | (0.17–0.38) |             |             | (50–102)    | (0.70–1.00) | (0.11–0.21) | (0.55–0.72) | (20–100)   |             |             | (12.7–19.0) |                   |
|  | Croatia, Neretva B&H River | 0.054       |             |             |             |             |             |             |            |             |             |             | [57]              |
|  | Croatia River Raša         | 0.04        | 2.58        | 0.51        | 14.4        | 0.22        | 0.23        | 0.28        | 20.4       | 2.94        | 1.17        | 17.7        | <i>This study</i> |
|  |                            | (0.02–0.08) | (1.14–5.41) | (0.02–1.05) | (3.06–31.1) | (0.16–0.32) | (0.11–0.73) | (0.16–0.63) | (7.2–70.5) | (0.60–18.0) | (0.58–1.54) | (11.5–27.7) |                   |

### Carp

|               |                            |               |             |             |        |             |             |             |             |             |             |             |       |
|---------------|----------------------------|---------------|-------------|-------------|--------|-------------|-------------|-------------|-------------|-------------|-------------|-------------|-------|
| Prussian carp | Slovenia Velenjsko Lake    |               | <DL         |             |        |             | 0.14        |             |             | 20          |             | 6.71        |       |
|               |                            |               |             |             |        |             | (0.05–0.31) |             |             | (<DL–40)    |             | (0.05–10.9) |       |
|               | Slovenia Šalek Lakes       | 0.03          | 10          |             |        |             | 0.14        |             |             | 20          |             | 6.71        | [100] |
|               |                            | (<DL–0.07)    | (<DL–10)    |             |        |             | (0.05–0.31) |             |             | (<DL–40)    |             | (0.05–10.9) |       |
|               | B&H NP                     | 0.01          | 10          |             |        |             | 0.15        |             |             | 100         |             |             | [101] |
|               | Hutovo Blato               | (0.007–0.014) | (7–14)      |             |        |             | (0.14–0.15) |             |             | (94–105)    |             |             |       |
|               | Croatia, Neretva B&H River | 0.352         |             |             |        |             |             |             |             |             |             |             | [53]  |
|               | Croatia Raša River         | 0.05          | 0.15        | 4.51        | 12.0   | 0.31        | 0.42        | 0.27        | 29.8        | 4.65        | 0.91        | 7.88        | [57]  |
|               |                            | (0.04–0.05)   | (0.15–0.16) | (0.06–8.96) | (2–21) | (0.22–0.40) | (0.20–0.64) | (0.18–0.37) | (5.60–54.1) | (3.61–5.70) | (0.88–0.94) | (6.68–9.09) |       |

### Barbel

|                  |                          |             |            |      |     |            |             |         |     |           |     |             |                   |
|------------------|--------------------------|-------------|------------|------|-----|------------|-------------|---------|-----|-----------|-----|-------------|-------------------|
|                  |                          |             |            |      |     |            |             |         |     |           |     |             | <i>This study</i> |
| Common barbel    | Spain Turia River        | 0.02        | 1.80       |      |     | 0.79       |             |         |     | 62        |     | 3.60        |                   |
|                  |                          | (0.01–0.03) | (0.11–4.3) |      |     | (0.21–6.2) |             |         |     | (102–312) |     | (2.21–5.8)  |                   |
| Danube barbel    | Slovenia Šalek Lakes     | 0.05        | 20         |      |     |            | 0.1         |         |     | 20        |     | 11.3        | [51]              |
|                  |                          | (0.02–0.11) | (<DL–150)  |      |     |            | (0.06–0.15) |         |     | (<DL–40)  |     | (8.74–14.0) |                   |
|                  | NE Italy Barbucina creek | 4           | 7          | 0.11 | 200 | 5.28       | 0.55        | 18.78   | 230 | 100       | 0.8 | 34          | [101]             |
| W. Balkan barbel | Rep. N Macedonia River   |             | 2.1–8.4    |      |     | 0.4–1.6    |             | 0.5–0.9 |     | 100–400   |     |             | [102]             |

**Table S12**  
(continued)

| Species        | Country | Location     | As<br>(mg kg <sup>-1</sup> ) | Cd<br>(µg kg <sup>-1</sup> ) | Co<br>(mg kg <sup>-1</sup> ) | Cr<br>(µg kg <sup>-1</sup> ) | Cu<br>(mg kg <sup>-1</sup> ) | Hg<br>(mg kg <sup>-1</sup> ) | Mn<br>(mg kg <sup>-1</sup> ) | Ni<br>(µg kg <sup>-1</sup> ) | Pb<br>(µg kg <sup>-1</sup> ) | Se<br>(mg kg <sup>-1</sup> ) | Zn<br>(mg kg <sup>-1</sup> ) | Reference         |
|----------------|---------|--------------|------------------------------|------------------------------|------------------------------|------------------------------|------------------------------|------------------------------|------------------------------|------------------------------|------------------------------|------------------------------|------------------------------|-------------------|
| Common barbel  | Serbia  | Danube River | 0.35±0.03                    |                              | 0.02±0.01                    | 91.1±13.3                    | 0.42±0.07                    | 0.06±0.05                    | 0.20±0.04                    | 42.2±8.9                     | 24.4±24.4                    | 0.12±0.04                    | 4.08±0.67                    | [103]             |
|                |         | West Morava  | 0.21±0.05                    |                              | 0.01±0.00                    | 97.7±13.3                    | 0.43±0.03                    | 0.02±0.01                    | 0.27±0.03                    | 33.3±6.6                     | 20.0±20.0                    | 0.07±0.02                    | 6.69±0.43                    |                   |
|                |         | South Morava | 0.16±0.04                    |                              | 0.01±0.00                    | 80.0±8.8                     | 0.38±0.04                    | 0.08±0.02                    | 0.28±0.05                    | 24.4±4.4                     | 37.8±37.8                    | 0.14±0.05                    | 5.52±0.61                    |                   |
| Italian barbel | Croatia | Raša River   | 0.06                         | 0.38                         | 0.04                         | 1.0                          | 0.31                         | 0.14                         | 0.49                         | 7.12                         | 1.80                         | 0.70                         | 5.68                         | <i>This study</i> |
|                |         |              | (0.02–0.12)                  | (0.20–0.58)                  | (0.01–0.11)                  | (0.2–9)                      | (0.19–0.44)                  | (0.10–0.24)                  | (0.42–0.63)                  | (3.12–9.62)                  | (0.45–2.11)                  | (0.42–1.22)                  | (4.40–6.85)                  |                   |

### Roach

|  |    |             |  |  |  |  |           |  |  |  |  |  |  |      |
|--|----|-------------|--|--|--|--|-----------|--|--|--|--|--|--|------|
|  | UK | 2 locations |  |  |  |  | 0.02–0.12 |  |  |  |  |  |  | [82] |
|--|----|-------------|--|--|--|--|-----------|--|--|--|--|--|--|------|

|                |            |                        |                          |                  |                  |              |                  |                  |                  |                  |                  |                  |                  |                   |
|----------------|------------|------------------------|--------------------------|------------------|------------------|--------------|------------------|------------------|------------------|------------------|------------------|------------------|------------------|-------------------|
| Common roach   | France     | 5 French fishing areas | 0.09 (0.03–0.26)         | 5 (1–50)         |                  |              |                  | 0.09 (0.04–0.30) |                  | 59 (1–340)       |                  |                  | [46]             |                   |
|                |            | Seine River            |                          | 15–115           | 250–325          | 0.45–0.48    |                  | 1.2–1.4          |                  | 1,000–1,200      |                  | 18–30            | [104]            |                   |
|                |            | Seine River            |                          | 135              | 15               | 0.95         |                  | 1.08             |                  | 15               |                  | 21               | [105]            |                   |
|                |            | Czech Republic         | Elbe River               |                  |                  |              |                  | 0.09–0.45        |                  |                  |                  |                  | [106]            |                   |
|                |            | Slovenia               | Velenjsko Lake           |                  | <DL              |              |                  | 0.08 (0.03–0.16) |                  | 30 (10–50)       |                  | 13.4 (5.25–22.2) | [100]            |                   |
|                |            |                        | Šalek Lakes              | 0.07 (0.04–0.10) | <DL              |              |                  | 0.08 (0.03–0.16) |                  | 30 (10–50)       |                  | 13.4 (5.25–22.2) | [101]            |                   |
|                |            | Poland                 | Lake Pluszne             |                  |                  |              | 0.26 (0.17–0.39) | 0.07 (0.06–0.10) |                  |                  |                  | 6.12 (4.08–7.78) | [107]            |                   |
|                |            |                        | Warmia and Mazury Region |                  |                  |              | 0.21±0.13        | 0.14±0.03        | 0.11±0.05        |                  |                  | 4.52±1.04        | [108]            |                   |
| Albanian roach | Montenegro | Skadar Lake            | 0.06 (<DL–0.15)          | <DL              | <DL              | 178 (70–310) | 0.57 (0.38–0.92) | 0.10 (0.05–0.14) | 5.12 (0.37–9.4)  | 41 (20–60)       | <DL              | 19.5 (7.77–34.8) | [47]             |                   |
| Adriatic roach | Croatia    | Raša River             | 0.07 (0.06–0.08)         | 1.00 (0.68–1.23) | 0.07 (0.02–0.15) | 4 (2–8)      | 0.25 (0.21–0.39) | 0.11 (0.08–0.14) | 2.41 (0.49–4.06) | 21.9 (10.7–30.1) | 11.3 (1.21–14.8) | 0.74 (0.70–0.80) | 21.9 (11.9–25.7) | <i>This study</i> |

### Chub

|         |         |                   |                  |                  |                     |            |                  |                  |                  |                  |                 |                  |                  |                   |
|---------|---------|-------------------|------------------|------------------|---------------------|------------|------------------|------------------|------------------|------------------|-----------------|------------------|------------------|-------------------|
| E. chub | Serbia  | Pestana River     | <LOD–0.22        |                  |                     | 2.22–95.6  | 0.20–0.39        | 0.20–0.40        | 0.18–0.23        | <LOD–8.2         | <LOD–7.7        |                  | 7.24–16.5        | [76]              |
|         |         | Beljanica River   | 0.04–0.13        |                  |                     | 4.44–57.8  | 0.26–0.49        | 0.12–0.23        | 0.17–0.44        | 2.22–82.2        | <LOD–5.1        |                  | 8.9–16.1         |                   |
|         | Croatia | NP Plitvice Lakes | 0.02 (0.01–0.03) | 2.1 (0.55–5.4)   | 0.003 (0.002–0.005) | 8.1 (1–21) | 0.32 (0.20–0.45) | 0.09 (0.02–0.11) | 0.21 (0.11–0.38) | 11.6 (3–27)      | 4.1 (1–14)      | 0.30 (0.14–0.54) | 8.2 (4.3–12.5)   | [19]              |
|         |         | Raša River        | 0.03 (0.02–0.06) | 0.86 (0.37–1.33) | 0.04 (0.003–0.071)  | 3 (1–17)   | 0.34 (0.17–0.42) | 0.08 (0.04–0.19) | 0.51 (0.21–0.17) | 9.08 (1.94–23.6) | 1.22 (0.63–0.9) | 0.60 (0.37–0.80) | 11.0 (6.78–20.0) | <i>This study</i> |

**Table S12**  
(continued)

| Species              | Country  | Location           | As (mg)   | Cd (µg kg <sup>-1</sup> ) | Co (mg) | Cr (µg kg <sup>-1</sup> ) | Cu (mg)         | Hg (mg)     | Mn (mg)   | Ni (µg kg <sup>-1</sup> ) | Pb (µg kg <sup>-1</sup> ) | Se (mg) | Zn (mg)         | Reference |
|----------------------|----------|--------------------|-----------|---------------------------|---------|---------------------------|-----------------|-------------|-----------|---------------------------|---------------------------|---------|-----------------|-----------|
| Thicklip grey mullet | Italy    | Adriatic Sea       |           |                           |         | 160±50                    | 0.84±0.17       |             |           | 1,220±250                 | 40±20                     |         | 6.90±0.16       | [109]     |
|                      |          | Tyrrhenian Sea     |           | <DL                       |         | <DL–19                    | 0.34±0.20       | 0.10±0.06   |           |                           | <DL–11                    |         | 6.11±2.54       | [110]     |
|                      |          | Tyrrhenian Sea     |           | <DL–5                     |         | <DL–15                    | 0.73±1.01       | 0.05±0.04   |           |                           | <DL–24                    |         | 5.46±1.86       |           |
|                      | Portugal | Ria de Aveiro      |           | 6.32–7.30                 |         |                           | 0.85–0.86       |             |           | 85.1–98.5                 | 53.0–61.2                 |         | 9.47–10.8       | [54]      |
| Thinlip mullet       | Italy    | Adriatic Sea       |           |                           |         | 150±60                    | 0.88±0.06       |             |           | 1,100±240                 | 50±20                     |         | 6.53±1.34       | [109]     |
| Golden grey mullet   | Italy    | Straits of Messina |           | 61.4 (30.2–90)            |         | 292 (190–421)             | 2.80 (2.00–3.8) |             |           | 294 (150–371)             | 386 (280–550)             |         | 7.31 (6.17–9.0) | [111]     |
|                      |          | Adriatic Sea       |           |                           |         | 150±60                    | 0.93±0.14       |             |           | 1,060±120                 | 40±20                     |         | 6.59±1.14       | [109]     |
|                      | Spain    | Atlantic coast     | 1.38–2.00 | 13–30                     |         | 29–38                     | 0.2–0.6         | 0.010–0.013 | 2.25–2.50 | 21–70                     | 30–50                     |         | 3.10–8.41       | [55]      |
|                      | Portugal | Ria de Aveiro      |           | 23.6–25.9                 |         |                           | 0.74–0.84       |             |           | 93.2–111                  | 82.3–94.7                 |         | 11.6–12.2       | [54]      |
|                      | France   | La Plata           |           | <LOD                      |         |                           |                 | 0.40±0.0    |           |                           |                           |         | 49±4            | [52]      |

|                      |                            |                  |                  |                  |         |                  |                  |                  |                  |                  |                  |                  |                   |       |
|----------------------|----------------------------|------------------|------------------|------------------|---------|------------------|------------------|------------------|------------------|------------------|------------------|------------------|-------------------|-------|
| Lebranche mullet     | Guadalquivir               | <LOD             |                  |                  |         | 0.5±0.3          |                  |                  |                  |                  |                  |                  | 8.5±5.9           |       |
|                      | Gironde estuary            | <LOD             |                  |                  |         | 0.34±0.05        | 0.10±0.01        |                  |                  |                  |                  |                  | 4.2±0.5           |       |
| Flathead grey mullet | Portugal Ria de Aveiro     | 1.83–20.1        |                  |                  |         | 0.49–0.64        |                  |                  |                  | 57.3–107.4       | 4.05–44.1        |                  | 4.63–7.95         | [54]  |
|                      | Algeria Annaba             | 106              |                  |                  |         | 1.8              |                  |                  |                  | 55.1             | 269              |                  | 24.0              | [112] |
|                      | Bulgaria Varna, Black Sea  | 0.90±0.10        | 24±2             |                  |         |                  | 0.08±0.01        |                  |                  |                  | 70±10            |                  |                   | [113] |
|                      | Nesebar, Black Sea         | 1.10±0.10        | 12±2             |                  |         |                  | 0.05±0.01        |                  |                  |                  | 50±10            |                  |                   |       |
|                      | Turkey Iskenderun Bay      | 8.88–29.3        |                  |                  |         |                  |                  |                  |                  |                  |                  |                  | 5.82–27.6         | [114] |
|                      | Iskenderun                 |                  |                  |                  |         | 1,460±53         | 1.45±0.6         |                  |                  | 1,220±80         | 7,450±3          |                  | 38.2±14.2         | [115] |
|                      | Tunisia Gulf of Gabes      | 933±622          |                  |                  |         | 1.39±0.85        |                  |                  |                  | 1,157±318        |                  |                  | 0.17±0.02         | [116] |
|                      | Croatia Neretva River      | 0.31±0.05        | 52±30 (14–100)   |                  |         |                  | 0.20±0.04        |                  |                  |                  | 106±6 (100–115)  |                  |                   | [56]  |
|                      | Croatia, Neretva B&H River | 0.33             |                  |                  |         |                  |                  |                  |                  |                  |                  |                  |                   | [57]  |
|                      | Croatia Raša Bay           | 0.36–1.3         | 0.9–1.3          | 0.005–0.008      | 31–106  | 0.24–0.41        | 0.001–0.041      | 0.13–0.35        | 42–599           | 2–17             | 0.31–0.53        | 4.6–5.1          |                   | [9]   |
|                      | Croatia Raša River         | 0.42 (0.36–0.71) | 0.31 (0.25–0.37) | 0.01 (0.01–0.03) | 4 (3–9) | 0.37 (0.26–0.47) | 0.04 (0.02–0.06) | 0.17 (0.12–0.37) | 8.22 (5.31–9.48) | 3.54 (0.85–5.06) | 0.27 (0.23–0.59) | 7.78 (7.10–10.0) | <i>This study</i> |       |

**Table S13** Comparison of average concentrations [arithmetic mean (range) or arithmetic mean ±standard deviation] of macro (Ca, K, Mg, Na) and trace (Ag, Fe, Mo, Sr, Tl, V) elements [in mg kg<sup>-1</sup> or µg kg<sup>-1</sup> wet mass (wm)] in muscle tissue of six freshwater fish species from the Raša River (Istria, Croatia) with the literature data for similar freshwater species from European rivers, lakes and reservoirs

| Species                  | Country     | Location           | Ca (mg)       | K (mg)              | Mg (mg)       | Na (mg)       | Ag (µg)          | Fe (mg)          | Mo (µg)          | Sr (mg)          | Tl (µg)          | V (µg)           | Reference         |
|--------------------------|-------------|--------------------|---------------|---------------------|---------------|---------------|------------------|------------------|------------------|------------------|------------------|------------------|-------------------|
| <i>Eel</i>               |             |                    |               |                     |               |               |                  |                  |                  |                  |                  |                  |                   |
| European eel             | Croatia     | Raša River         | 221 (108–346) | 2,429 (1,831–3,002) | 193 (140–241) | 545 (387–695) | 0.65 (0.08–1.75) | 2.91 (1.83–4.60) | 2.44 (0.13–4.45) | 0.38 (0.12–0.82) | 2.56 (0.81–5.21) | 2.78 (1.05–5.01) | <i>This study</i> |
|                          | Belgium     | Belgium            |               |                     |               |               | 18.3±0.2         | 2.1±0.3          | 32.1±4.2         |                  | 4.4±0.6          | 5.0±0.5          | [86]              |
|                          | Poland      | 5 regions          | 142–864       | 2,046–2,599         | 158–267       | 463–739       |                  | 2.37–13.1        |                  | 0.06–6.31        |                  |                  | [88]              |
|                          | Latvia      | 5 lakes            |               |                     | 161–240       |               |                  | 6.1–17.4         |                  | 0.04–0.34        |                  |                  | [89]              |
|                          | Spain       | Odiel, Guadiana    |               |                     |               |               |                  | 4.11–5.00        |                  |                  |                  |                  | [55]              |
|                          | Spain       | Albufera           |               |                     |               |               |                  | 3.72–17.1        |                  |                  |                  |                  | [91]              |
|                          | France      | Camargue Biosphere |               |                     | 119–181       | 57.6–332      |                  | 2.60–6.24        | 4.76–21.4        | 0.25–0.72        |                  |                  | [94]              |
|                          | Turkey      | Asi River          |               |                     |               |               |                  | 14.1±3.1         |                  |                  |                  |                  | [98]              |
|                          | Montenegro  | Skadar Lake        | 5.31±1.95     |                     | 1.84±1.23     |               |                  | 3.23±0.78        |                  |                  |                  |                  | [47]              |
| <i>Barbel</i>            |             |                    |               |                     |               |               |                  |                  |                  |                  |                  |                  |                   |
| Italian barbel           | Croatia     | Raša River         | 447 (397–682) | 2,690 (2,562–3,228) | 265 (246–288) | 425 (309–482) | 0.16 (0.08–0.25) | 2.62 (2.22–3.00) | 2.75 (1.47–4.00) | 0.66 (0.59–1.10) | 1.10 (0.44–2.02) | 3.21 (2.07–5.50) | <i>This study</i> |
| Danube barbel            | NE Italy    | Barbucina Creek    |               |                     |               |               |                  | 85.1             | 80               |                  | 2                | 1,400            | [102]             |
| W. Balkan Commo n barbel | N Macedonia | Crn Drim River     |               |                     |               |               |                  | 4.6–10.4         |                  |                  |                  |                  | [74]              |
|                          | Serbia      | Danube River       |               |                     |               |               |                  |                  | 40.0±11.1        | 0.18±0.07        |                  |                  | [103]             |
|                          | Serbia      | West Morava        |               |                     |               |               |                  |                  | 28.9±17.8        | 0.52±0.12        |                  |                  |                   |

|                                 | Serbia     | South Morava                 |                    |                        |                    |                  |                     | 2.22±22.2           | 1.30±0.19           |                     |                     |                     |                   |
|---------------------------------|------------|------------------------------|--------------------|------------------------|--------------------|------------------|---------------------|---------------------|---------------------|---------------------|---------------------|---------------------|-------------------|
| <b>Roach</b>                    |            |                              |                    |                        |                    |                  |                     |                     |                     |                     |                     |                     |                   |
| Adriatic roach                  | Croatia    | Raša River                   | 3,944<br>(531–4,   | 2,639<br>(2,481–2,     | 306<br>(250–3      | 425<br>(411–4    | 0.36<br>(0.12–1     | 3.79<br>(2.83–5     | 9.57<br>(6.44–10    | 7.59<br>(0.97–8.    | 1.03<br>(0.51–1.    | 8.87<br>(2.12–1     | <i>This study</i> |
| Common roach                    | France     | Seine River                  |                    |                        |                    |                  |                     | 16.5–2              |                     |                     |                     |                     | [104]             |
|                                 | France     | Seine River                  |                    |                        |                    |                  |                     | 16                  |                     |                     |                     |                     | [105]             |
|                                 | Poland     | Warmia and Mazury            |                    |                        |                    |                  |                     | 1.01±0.44           |                     |                     |                     |                     | [108]             |
| Albanian roach                  | Montenegro | Skadar Lake                  | 38.5±2.7           |                        | 9.3±5.1<br>(2.6–16 |                  |                     | 14.5±7.41           |                     |                     |                     |                     | [47]              |
| <b>Table S13</b><br>(continued) |            |                              |                    |                        |                    |                  |                     |                     |                     |                     |                     |                     |                   |
| Species                         | Country    | Location                     | Ca<br>(mg          | K<br>(mg               | Mg<br>(mg          | Na<br>(mg        | Ag<br>(µg           | Fe<br>(mg           | Mo<br>(µg           | Sr<br>(mg           | Tl<br>(µg           | V<br>(µg            | Reference         |
| <b>Chub</b>                     |            |                              |                    |                        |                    |                  |                     |                     |                     |                     |                     |                     |                   |
| Italian chub                    | Croatia    | Raša river                   | 485<br>(171–3,855) | 3,234<br>(1,236–3,539) | 250<br>(148–337)   | 377<br>(183–403) | 0.20<br>(0.10–0.92) | 3.36<br>(1.96–4.84) | 4.77<br>(2.90–7.45) | 0.81<br>(0.34–4.80) | 0.80<br>(0.38–1.47) | 3.20<br>(1.13–7.59) | <i>This study</i> |
|                                 | Hungary    | River Szamos/Somesh          | 151–307            | 1,063–3,070            | 105–264            | 186–364          |                     | 1.58–8.27           |                     | 0.33–1.25           |                     |                     | [117]             |
| European chub                   | Serbia     | Pestana River                |                    |                        |                    |                  |                     | 1.57–2.44           | 6.67–136            | 0.22–0.68           |                     |                     | [76]              |
|                                 | Serbia     | Beljanica River              |                    |                        |                    |                  |                     | 1.69–3.91           | 15.6–42.2           | 0.4–4.0             |                     |                     | [76]              |
|                                 | Croatia    | National Park Plitvice Lakes | 525<br>(119–1,676) | 4,556<br>(4,105–5,028) | 356<br>(318–404)   | 672<br>(560–867) | 0.14<br>(0.03–0.39) | 5.33<br>(2.89–7.52) | 4<br>(1–27)         | 0.17<br>(0.04–0.39) | 1.80<br>(0.70–3.61) | 9<br>(7–16)         | [19]              |
| <b>Grey mullet</b>              |            |                              |                    |                        |                    |                  |                     |                     |                     |                     |                     |                     |                   |
| Flathead grey mullet            | Croatia    | Raša River                   | 137<br>(92–316)    | 3,524<br>(3,248–3,727) | 244<br>(203–256)   | 351<br>(268–367) | 0.17<br>(0.10–0.37) | 8.16<br>(5.17–10.2) | 29.8<br>(2.91–89.4) | 0.50<br>(0.22–1.76) | 4.22<br>(0.43–8.93) | 4.50<br>(2.87–9.46) | <i>This study</i> |
|                                 | Algeria    | Annaba Gulf                  |                    |                        |                    |                  |                     | 32.8                |                     |                     |                     |                     | [112]             |
|                                 | Turkey     | Iskenderun Bay               |                    |                        |                    |                  |                     | 0.73–2.27           |                     |                     |                     |                     | [114]             |
|                                 | Turkey     | Iskenderun Bay               |                    |                        |                    |                  |                     | 70.3 ± 0.4          |                     |                     |                     |                     | [118]             |
|                                 | India      | Krishna River                | 171–217            | 2,260–2,553            | 231–246            | 318–402          |                     | 6.8–7.3             |                     |                     |                     |                     | [119]             |
|                                 | Italy      | St. Giusta Lagoon, Sardinia  | 86.5–473           | 3,000–5,560            | 240–393            | 188–488          |                     | 2.5–16.0            |                     |                     |                     |                     | [120]             |
|                                 | Croatia    | Raša Bay                     |                    |                        |                    |                  | 0.4–1.5             | 6.5–10.5            | 3.8–14              |                     |                     | 7.3–14.0            | [9]               |
| Golden grey mullet              | Spain      | Atlantic coast               |                    |                        |                    |                  |                     | 4.11–7.13           |                     |                     |                     |                     | [55]              |
| <b>Carp</b>                     |            |                              |                    |                        |                    |                  |                     |                     |                     |                     |                     |                     |                   |
| Prussian carp                   | Croatia    | Raša River                   | 348<br>(223–452)   | 2,744<br>(2,562–2,825) | 258<br>(236–282)   | 306<br>(276–335) | 0.23<br>(0.20–0.26) | 5.58<br>(4.49–6.67) | 2.40<br>(2.12–2.68) | 0.45<br>(0.30–0.60) | 0.39<br>(0.24–0.54) | 1.60<br>(1.31–1.88) | <i>This study</i> |
| European carp                   | Croatia    | Croatian market              |                    |                        |                    |                  |                     | 7.4<br>(2.6–11)     |                     |                     |                     |                     | [121]             |
|                                 | Montenegro | Skadar Lake                  | 6.08<br>(4.1–13    |                        | 2.33<br>(0.3–4.    |                  |                     | 6.95<br>(2.62–1     |                     |                     |                     |                     | [47]              |
| Common carp                     | Turkey     | 3 water reservoirs           | 120–374            | 2,956–4,164            | 208–297            | 211–353          |                     |                     |                     |                     |                     |                     | [122]             |
|                                 | Bulgaria   | different production         | 287±15             | 3,406±76               | 325±8              | 344±16           |                     | 5.86±0.38           |                     |                     |                     |                     | [123]             |
| Crucian carp                    | Poland     | fish farms                   | 1,030±250          | 2,810±240              | 250±270            | 350±530          |                     |                     |                     |                     |                     |                     | [124]             |
| Silver carp                     | Poland     | fish farms                   | 290±370            | 2,920±530              | 230±210            | 270±210          |                     |                     |                     |                     |                     |                     |                   |
